# Supplementary material for: High diversity in the regulatory region of Shiga toxin encoding bacteriophages
Source: PubMed Central journal article supplement (PMC8951638; doi:10.1186/s12864-022-08428-5), 2022-03-24
Supplement: 12864_2022_8428_MOESM1_ESM.pdf [file 12864_2022_8428_MOESM1_ESM.pdf]

## Additional file 1

### Stx-converting phage genomes with Eru type

| Phage                                                  | Serotype | Acc no      | Country | Year | Stx type | Eru type |
|--------------------------------------------------------|----------|-------------|---------|------|----------|----------|
| Shigella phage 75/02 Stx                               | Shigella | NC_029120.1 | Ungarn  | 2013 | Stx1     | Eru4     |
| Shigella phage POCJ13                                  | Shigella | KJ603229    | USA     | 2014 | Stx1     | Eru4     |
| Stx2 Converting phage I                                | O157:H7  | AP004402    | Japan   | 2001 | Stx2a    | lambdoid |
| Stx2 Converting phage II                               | O157:H7  | AP005154    | Japan   | 2002 | Stx2     | Eru3     |
| Stx2 Converting phage 1717                             | O157:H7  | FJ188381    | Canada  | 2008 | Stx2a    | Eru2     |
| Escherichia phage PA4                                  | O157:H7  | KP682372.1  | USA     | 2015 | Stx2a    | Eru3     |
| Escherichia phage PA5                                  | O157:H7  | KP682373.1  | USA     | 2015 | Stx2a    | Eru3     |
| Escherichia phage PA11                                 | O157:H7  | KP682375.1  | USA     | 2015 | Stx2a    | Eru3     |
| Escherichia phage PA12                                 | O157:H7  | KP682376.1  | USA     | 2015 | Stx2a    | Eru3     |
| Escherichia phage PA16                                 | O157:H7  | KP682377.1  | USA     | 2015 | Stx2a    | Eru3     |
| Escherichia phage PA21                                 | O157:H7  | KP682379.1  | USA     | 2015 | Stx2a    | Eru3     |
| Escherichia phage PA27                                 | O157:H7  | KP682380.1  | USA     | 2015 | Stx2a    | Eru3     |
| Escherichia phage PA28                                 | O157:H7  | KP682381.1  | USA     | 2015 | Stx2a    | lambdoid |
| Escherichia phage PA29                                 | O157:H7  | KP682382.1  | USA     | 2015 | Stx2a    | Eru3     |
| Escherichia phage PA36                                 | O157:H7  | KP682386.1  | USA     | 2015 | Stx2a    | Eru3     |
| Escherichia phage PA42                                 | O157:H7  | KP682387.1  | USA     | 2015 | Stx2a    | Eru3     |
| Escherichia phage PA45                                 | O157:H7  | KP682389.1  | USA     | 2015 | Stx2a    | Eru3     |
| Escherichia phage PA50                                 | O157:H7  | KP682390.1  | USA     | 2015 | Stx2a    | Eru3     |
| Escherichia phage PA52                                 | O157:H7  | KP682392.1  | USA     | 2015 | Stx2a    | Eru3     |
| Escherichia phage P13771                               | O104:H4  | HG792104.1  | Germany | 2009 | Stx2a    | Eru1     |
| Escherichia phage P14437                               | O104:H4  | HG792105.1  | Norway  | 2006 | Stx2a    | Eru1     |
| Escherichia phage P13363                               | O104:H4  | HG803182.1  | Germany | 2011 | Stx2a    | Eru1     |
| Escherichia phage P13374 proviral                      | O104:H4  | HE664024.1  | Germany | 2011 | Stx2a    | Eru1     |
| Enterobacteria phage YYZ-2008                          | O157:H7  | FJ184280    | Canada  | 2008 | Stx1     | Eru2     |
| Escherichia phage SH2026Stx1                           | O157:H7  | NC_049919.1 | USA     | 2018 | Stx1     | Eru2     |
| Escherichia phage GER2                                 | O117:H7  | MG710528.1  | UK      | 2017 | Stx1     | Eru1     |
| Escherichia Stx1-converting recombinant phage HUN/2013 | O157:H7  | KJ909655.1  | Hungary | 2013 | Stx1     | Eru3     |
| Stx1 converting phage                                  | O157:H7  | AP005153.1  | Japan   | 2003 | Stx1     | Eru3     |
| Bacteriophage CP-1639 and chromosomal integration site | O111:H-  | AJ304858.2  | Germany | 2000 | Stx1     | Eru3     |
| Phage BP-4795 complete genome                          | O84:H4   | AJ556162.1  | Germany | 2003 | Stx1     | lambdoid |
| Stx2-converting phage Stx2a_WGPS9 proviral             | O157:H7  | AP012535.1  | Japan   | 2012 | Stx2a    | lambdoid |
| Stx2-converting phage Stx2a_F403 proviral              | O157:H7  | AP012529.1  | Japan   | 2012 | Stx2a    | Eru5     |
| Stx2-converting phage Stx2a_F422 proviral              | O157:H7  | AP012531.1  | Japan   | 2012 | Stx2a    | lambdoid |
| Stx2-converting phage Stx2a_F451 proviral              | O157:H7  | AP012532.1  | Japan   | 2012 | Stx2a    | Eru5     |
| Stx2-converting phage Stx2a_F723 proviral              | O157:H7  | AP012533.1  | Japan   | 2012 | Stx2a    | lambdoid |
| Escherichia phage P13803                               | O2:H27   | HG792102.1  | Germany | 2013 | Stx2a    | Eru1     |

|                                                      |          |             |           |      |       |          |
|------------------------------------------------------|----------|-------------|-----------|------|-------|----------|
| Stx2-converting phage Stx2a_F765 proviral            | O157:H7  | AP012534.1  | Japan     | 2012 | Stx2a | Eru1     |
| Stx2-converting phage 86                             | O86:H-   | NC_008464.1 | USA       | 2003 | Stx2a | Eru3     |
| Stx2-converting phage Stx2a_WGPS8 proviral           | O157:H7  | AP012540.1  | Japan     | 2012 | Stx2c | Eru2     |
| Stx2-converting phage Stx2a_WGPS4 proviral           | O157:H7  | AP012538.1  | Japan     | 2012 | Stx2c | Eru2     |
| Stx2-converting phage Stx2a_F349 proviral            | O157:H7  | AP012530.1  | Japan     | 2012 | Stx2c | Eru2     |
| Stx2-converting phage 1717, complete prophage genome | O157:H7  | NC_011357.1 | Canada    | 2008 | Stx2c | Eru2     |
| Enterobacteria phage 2851                            | O157:H7  | FM180578.1  | Germany   | 1993 | Stx2c | Eru2     |
| Stx2-converting phage Stx2a_WGPS6 proviral           | O157:H7  | AP012539.1  | Japan     | 2012 | Stx2c | Eru2     |
| Stx2-converting phage Stx2a_WGPS2 proviral           | O157:H7  | AP012537.1  | Japan     | 2012 | Stx2c | Eru6     |
| Stx2-converting phage Stx2a_1447 proviral            | O157:H7  | AP012536.1  | Japan     | 2012 | Stx2c | Eru6     |
| Stx2 converting phage vB_EcoP_24B                    | O157:H7  | HM208303.1  | UK        | 2010 | Stx2  | Eru5     |
| Enterobacteria phage Min27                           | O157:H7  | NC_010237.1 | China     | 2007 | Stx2a | Eru5     |
| Lys8385Vzw                                           | O103:H11 | MT225100    | Japan     | 2020 | Stx1  | Eru6     |
| Lys19259Vzw                                          | O157:H7  | MT225101    | Japan     | 2020 | Stx2  | lambdoid |
| Bacteriophage P27                                    | Ont:H-   | AJ298298.1  | Germany   | 2001 | stx2e | Eru7     |
| Stx1 converting phage AU5Stx1                        | O157     | KU977419.1  | Australia | 2016 | Stx1  | lambdoid |
| Stx1 converting phage AU6Stx1                        | O157     | KU977420.1  | Australia | 2016 | Stx1  | lambdoid |
| Stx2a-converting phage Stx2_14040                    | O145:H28 | LC567818.1  | Japan     | 2020 | Stx2a | Eru7     |
| Stx1a-converting phage Stx1_14040                    | O145:H28 | LC567819.1  | Japan     | 2020 | Stx1  | Eru7     |
| Stx2a-converting phage Stx2_14744                    | O145:H28 | LC567820.1  | Japan     | 2020 | Stx2a | Eru7     |
| Stx1a-converting phage Stx1_14744                    | O145:H28 | LC567821.1  | Japan     | 2020 | Stx1  | Eru7     |
| Stx1a-converting phage Stx1_132418                   | O145:H28 | LC567823.1  | Japan     | 2020 | Stx1  | Eru7     |
| Stx2a-converting phage Stx2_499                      | O145:H28 | LC567824.1  | Japan     | 2020 | Stx2a | Eru7     |
| Stx1a-converting phage Stx1_499                      | O145:H28 | LC567825.1  | Japan     | 2020 | Stx1  | Eru7     |
| Stx1a-converting phage Stx1_699                      | O145:H28 | LC567827.1  | Japan     | 2020 | Stx1  | Eru7     |
| Stx2a-converting phage Stx2_EH2201                   | O145:H28 | LC567829.1  | Japan     | 2020 | Stx2a | Eru7     |
| Stx2d-converting phage Stx2_112808                   | O145:H28 | LC567830.1  | Japan     | 2020 | Stx2a | Eru7     |
| Stx1a-converting phage Stx1_EH1995                   | O145:H28 | LC567831.1  | Japan     | 2020 | Stx1  | Eru7     |
| Stx1a-converting phage Stx1_EH1992                   | O145:H28 | LC567833.1  | Japan     | 2020 | Stx1  | Eru7     |
| Stx2a-converting phage Stx2_EH1910                   | O145:H28 | LC567834.1  | Japan     | 2020 | Stx2a | Eru7     |
| Stx2a-converting phage Stx2_EH2246                   | O145:H28 | LC567837.1  | Japan     | 2020 | Stx2a | Eru7     |
| Stx2a-converting phage Stx2_95                       | O145:H28 | LC567838.1  | Japan     | 2020 | Stx2a | Eru7     |
| Stx2a-converting phage Stx2_EH1846                   | O145:H28 | LC567840.1  | Japan     | 2020 | Stx2a | Eru7     |
| Stx2a-converting phage Stx2_12E129_PPompW            | O145:H28 | LC567841.1  | Japan     | 2020 | Stx2a | Eru7     |
| Stx2a-converting phage Stx2_12E129_yecE              | O145:H28 | LC567842.1  | Japan     | 2020 | Stx2a | Eru7     |
| Stx2a-converting phage Stx2_EH0505                   | O121:H19 | LC616031.1  | Japan     | 2021 | Stx2a | Eru2     |
| Stx2a-converting phage Stx2_EH1965                   | O121:H19 | LC616032.1  | Japan     | 2021 | Stx2a | Eru2     |
| Stx2a-converting phage Stx2_EH0787                   | O121:H19 | LC616033.1  | Japan     | 2021 | Stx2a | Eru2     |
| Stx2a-converting phage Stx2_EH0337                   | O121:H19 | LC616034.1  | Japan     | 2021 | Stx2a | Eru2     |
| Stx2a-converting phage Stx2_13E027                   | O121:H19 | LC616035.1  | Japan     | 2021 | Stx2a | Eru2     |
| Stx2a-converting phage Stx2_PV06-102                 | O121:H19 | LC616036.1  | Japan     | 2021 | Stx2a | Eru2     |

|                                      |          |            |       |      |       |      |
|--------------------------------------|----------|------------|-------|------|-------|------|
| Stx2a-converting phage Stx2_4151     | O121:H19 | LC616037.1 | Japan | 2021 | Stx2a | Eru2 |
| Stx2a-converting phage Stx2_707      | O121:H19 | LC616038.1 | Japan | 2021 | Stx2a | Eru2 |
| Stx2a-converting phage Stx2_131033   | O121:H19 | LC616039.1 | Japan | 2021 | Stx2a | Eru2 |
| Stx2a-converting phage Stx2_3993     | O121:H19 | LC616040.1 | Japan | 2021 | Stx2a | Eru2 |
| Stx2a-converting phage Stx2_PV12-16  | O121:H19 | LC616041.1 | Japan | 2021 | Stx2a | Eru2 |
| Stx2a-converting phage Stx2_12E064   | O121:H19 | LC616042.1 | Japan | 2021 | Stx2a | Eru2 |
| Stx2a-converting phage Stx2_3725     | O121:H19 | LC616043.1 | Japan | 2021 | Stx2a | Eru2 |
| Stx2a-converting phage Stx2_8243     | O121:H19 | LC616044.1 | Japan | 2021 | Stx2a | Eru2 |
| Stx2a-converting phage Stx2_481      | O121:H19 | LC616045.1 | Japan | 2021 | Stx2a | Eru2 |
| Stx2a-converting phage Stx2_5122     | O121:H19 | LC616046.1 | Japan | 2021 | Stx2a | Eru2 |
| Stx2a-converting phage Stx2_6804     | O121:H19 | LC616047.1 | Japan | 2021 | Stx2a | Eru2 |
| Stx2a-converting phage Stx2_07Y06    | O121:H19 | LC616048.1 | Japan | 2021 | Stx2a | Eru2 |
| Stx2a-converting phage Stx2_11Y11    | O121:H19 | LC616049.1 | Japan | 2021 | Stx2a | Eru2 |
| Stx2a-converting phage Stx2_3350     | O121:H19 | LC616050.1 | Japan | 2021 | Stx2a | Eru2 |
| Stx2a-converting phage Stx2_PV07-173 | O121:H19 | LC616051.1 | Japan | 2021 | Stx2a | Eru2 |
| Stx2a-converting phage Stx2_7982     | O121:H19 | LC616052.1 | Japan | 2021 | Stx2a | Eru2 |
| Stx2a-converting phage Stx2_12849    | O121:H19 | LC616053.1 | Japan | 2021 | Stx2a | Eru2 |
| Stx2a-converting phage Stx2_12E092   | O121:H19 | LC616054.1 | Japan | 2021 | Stx2a | Eru2 |
| Stx2a-converting phage Stx2_1603     | O121:H19 | LC616055.1 | Japan | 2021 | Stx2a | Eru2 |
| Stx2a-converting phage Stx2_3772     | O121:H19 | LC616056.1 | Japan | 2021 | Stx2a | Eru2 |
| Stx2a-converting phage Stx2_579      | O121:H19 | LC616057.1 | Japan | 2021 | Stx2a | Eru2 |
| Stx2a-converting phage Stx2_716      | O121:H19 | LC616058.1 | Japan | 2021 | Stx2a | Eru2 |
| Stx2a-converting phage Stx2_3105     | O121:H19 | LC616059.1 | Japan | 2021 | Stx2a | Eru2 |
| Stx2a-converting phage Stx2_3417     | O121:H19 | LC616060.1 | Japan | 2021 | Stx2a | Eru2 |
| Stx2a-converting phage Stx2_12874    | O121:H19 | LC616061.1 | Japan | 2021 | Stx2a | Eru2 |
| Stx2a-converting phage Stx2_3896     | O121:H19 | LC616062.1 | Japan | 2021 | Stx2a | Eru2 |
| Stx2a-converting phage Stx2_3418     | O121:H19 | LC616063.1 | Japan | 2021 | Stx2a | Eru2 |
| Stx2a-converting phage Stx2_453      | O121:H19 | LC616064.1 | Japan | 2021 | Stx2a | Eru2 |
| Stx2a-converting phage Stx2_463      | O121:H19 | LC616065.1 | Japan | 2021 | Stx2a | Eru2 |
| Stx2a-converting phage Stx2_11106    | O121:H19 | LC616066.1 | Japan | 2021 | Stx2a | Eru2 |
| Stx2a-converting phage Stx2_356      | O121:H19 | LC616067.1 | Japan | 2021 | Stx2a | Eru2 |
| Stx2a-converting phage Stx2_522      | O121:H19 | LC616068.1 | Japan | 2021 | Stx2a | Eru2 |
| Stx2a-converting phage Stx2_635      | O121:H19 | LC616069.1 | Japan | 2021 | Stx2a | Eru2 |
| Stx2a-converting phage Stx2_15436    | O121:H19 | LC616070.1 | Japan | 2021 | Stx2a | Eru2 |
| Stx2a-converting phage Stx2_8048     | O121:H19 | LC616071.1 | Japan | 2021 | Stx2a | Eru2 |
| Stx2a-converting phage Stx2_PV03-14  | O121:H19 | LC616072.1 | Japan | 2021 | Stx2a | Eru2 |
| Stx2a-converting phage Stx2_08E027   | O121:H19 | LC616073.1 | Japan | 2021 | Stx2a | Eru2 |
| Stx2a-converting phage Stx2_10902    | O121:H19 | LC616074.1 | Japan | 2021 | Stx2a | Eru2 |
| Stx2a-converting phage Stx2_06E050   | O121:H19 | LC616075.1 | Japan | 2021 | Stx2a | Eru2 |
| Stx2a-converting phage Stx2_2935     | O121:H19 | LC616076.1 | Japan | 2021 | Stx2a | Eru2 |
| Stx2a-converting phage Stx2_13518    | O121:H19 | LC616077.1 | Japan | 2021 | Stx2a | Eru2 |

|                                      |          |            |       |      |       |      |
|--------------------------------------|----------|------------|-------|------|-------|------|
| Stx2a-converting phage Stx2_10E082   | O121:H19 | LC616078.1 | Japan | 2021 | Stx2a | Eru2 |
| Stx2a-converting phage Stx2_KH16-043 | O121:H19 | LC616079.1 | Japan | 2021 | Stx2a | Eru7 |
