# Supplementary material for: High diversity in the regulatory region of Shiga toxin encoding bacteriophages
Source: PubMed Central journal article supplement (PMC8951638; doi:10.1186/s12864-022-08428-5), 2022-03-24
Supplement: 12864_2022_8428_MOESM2_ESM.pdf [file 12864_2022_8428_MOESM2_ESM.pdf]

## Additional file 2

BioProjects comprising European STEC strains with Eru type

| <b>PRJNA285020</b>                                                                            |                              |                     |
|-----------------------------------------------------------------------------------------------|------------------------------|---------------------|
| <b>Shiga toxin-producing <i>Escherichia coli</i> isolates obtained from two Dutch regions</b> |                              |                     |
| <b>Strain</b>                                                                                 | <b>NCBI<br/>Accession no</b> | <b>Eru<br/>type</b> |
| <b>Stx2</b>                                                                                   |                              |                     |
| Escherichia coli strain E09/10 contig_97, whole genome shotgun sequence                       | LGBK01000097.1               | ND                  |
| Escherichia coli strain STEC 1109 contig_168, whole genome shotgun sequence                   | LGBC01000168.1               | ND                  |
| Escherichia coli strain STEC 1255 STEC1255_contig_195, whole genome shotgun sequence          | LOGC01000107.1               | ND                  |
| Escherichia coli strain STEC 1293 STEC1293_contig_49, whole genome shotgun sequence           | LOGF01000197.1               | Eru7                |
| Escherichia coli strain STEC 1299 STEC1299_contig_22, whole genome shotgun sequence           | LOGG01000057.1               | Eru6                |
| Escherichia coli strain STEC 1363 STEC1363_contig_23, whole genome shotgun sequence           | LOGI01000090.1               | Eru6                |
| Escherichia coli strain STEC 1375 STEC1375_contig_25, whole genome shotgun sequence           | LOGJ01000018.1               | Eru7                |
| Escherichia coli strain STEC 1442 STEC1442_contig_2, whole genome shotgun sequence            | LOGK01000083.1               | Eru7                |
| Escherichia coli strain STEC 1506 STEC1506_contig_10, whole genome shotgun sequence           | LPWV01000002.1               | ND                  |
| Escherichia coli strain STEC 1528 STEC1528_contig_43, whole genome shotgun sequence           | LOGP01000038.1               | ND                  |
| Escherichia coli strain STEC 1634 STEC1634_contig_43, whole genome shotgun sequence           | LOGS01000097.1               | ND                  |
| Escherichia coli strain STEC 1686 STEC1686_contig_77, whole genome shotgun sequence           | LOGT01000177.1               | Eru10               |
| Escherichia coli strain STEC 200 STEC-200_contig_39, whole genome shotgun sequence            | LNZL01000033.1               | Eru7                |
| Escherichia coli strain STEC 2075 contig_86, whole genome shotgun sequence                    | LGBD01000086.1               | ND                  |
| Escherichia coli strain STEC 2110.1 2110-1_contig_200, whole genome shotgun sequence          | LPWW01000114.1               | ND                  |
| Escherichia coli strain STEC 2110.1 2110-1_contig_204, whole genome shotgun sequence          | LPWW01000118.1               | ND                  |
| Escherichia coli strain STEC 2110.1 2110-1_contig_232, whole genome shotgun sequence          | LPWW01000149.1               | ND                  |
| Escherichia coli strain STEC 2110.1 2110-1_contig_40, whole genome shotgun sequence           | LPWW01000216.1               | ND                  |
| Escherichia coli strain STEC 2112 contig_150, whole genome shotgun sequence                   | LGBE01000150.1               | ND                  |
| Escherichia coli strain STEC 2236 STEC2236_contig_23, whole genome shotgun sequence           | LOGY01000073.1               | lambdoid            |
| Escherichia coli strain STEC 2257 contig_109, whole genome shotgun sequence                   | LGBF01000109.1               | ND                  |
| Escherichia coli strain STEC 2410 contig_189, whole genome shotgun sequence                   | LGBG01000189.1               | ND                  |
| Escherichia coli strain STEC 2410 contig_203, whole genome shotgun sequence                   | LGBG01000203.1               | ND                  |
| Escherichia coli strain STEC 2410 contig_72, whole genome shotgun sequence                    | LGBG01000072.1               | Eru1                |
| Escherichia coli strain STEC 2450 STEC2450_contig_65, whole genome shotgun sequence           | LPXA01000177.1               | Eru6                |
| Escherichia coli strain STEC 2499 STEC2499_contig_42, whole genome shotgun sequence           | LOIE01000070.1               | ND                  |
| Escherichia coli strain STEC 2505 STEC2505_contig_24, whole genome shotgun sequence           | LPXB01000100.1               | Eru6                |
| Escherichia coli strain STEC 2573 STEC2573_contig_104, whole genome shotgun sequence          | LOIH01000007.1               | ND                  |
| Escherichia coli strain STEC 2573 STEC2573_contig_138, whole genome shotgun sequence          | LOIH01000044.1               | ND                  |
| Escherichia coli strain STEC 2573 STEC2573_contig_62, whole genome shotgun sequence           | LOIH01000107.1               | ND                  |
| Escherichia coli strain STEC 2573 STEC2573_contig_7, whole genome shotgun sequence            | LOIH01000115.1               | ND                  |
| Escherichia coli strain STEC 2591 STEC2591_contig_56, whole genome shotgun sequence           | LOIH01000068.1               | ND                  |
| Escherichia coli strain STEC 2595 STEC2595_contig_34, whole genome shotgun sequence           | LOIJ01000033.1               | Eru11               |

|                                                                                      |                |       |
|--------------------------------------------------------------------------------------|----------------|-------|
| Escherichia coli strain STEC 2620 STEC2620_contig_169, whole genome shotgun sequence | LPXC01000078.1 | ND    |
| Escherichia coli strain STEC 2620 STEC2620_contig_226, whole genome shotgun sequence | LPXC01000142.1 | ND    |
| Escherichia coli strain STEC 2620 STEC2620_contig_69, whole genome shotgun sequence  | LPXC01000201.1 | ND    |
| Escherichia coli strain STEC 2667 contig_19, whole genome shotgun sequence           | LGBH01000019.1 | ND    |
| Escherichia coli strain STEC 2746 STEC2746_contig_61, whole genome shotgun sequence  | LPXD01000148.1 | Eru6  |
| Escherichia coli strain STEC 2770 STEC2770_contig_18, whole genome shotgun sequence  | LPXF01000088.1 | ND    |
| Escherichia coli strain STEC 2797 STEC2797_contig_85, whole genome shotgun sequence  | LOIP01000113.1 | ND    |
| Escherichia coli strain STEC 2820 contig_161, whole genome shotgun sequence          | LGBQ01000161.1 | ND    |
| Escherichia coli strain STEC 2821 contig_98, whole genome shotgun sequence           | LGBI01000098.1 | ND    |
| Escherichia coli strain STEC 2826 STEC2826_contig_97, whole genome shotgun sequence  | LOJA01000134.1 | ND    |
| Escherichia coli strain STEC 2861 STEC2861_contig_8, whole genome shotgun sequence   | LOIR01000058.1 | Eru11 |
| Escherichia coli strain STEC 2868 contig_83, whole genome shotgun sequence           | LGBJ01000083.1 | ND    |
| Escherichia coli strain STEC 2894.2 2894-2_contig_216, whole genome shotgun sequence | LOIT01000131.1 | ND    |
| Escherichia coli strain STEC 2953 STEC2953_contig_5, whole genome shotgun sequence   | LOIW01000084.1 | Eru10 |
| Escherichia coli strain STEC 2954 STEC2954_contig_124, whole genome shotgun sequence | LPXE01000029.1 | ND    |
| Escherichia coli strain STEC 2980 STEC2980_contig_28, whole genome shotgun sequence  | LOIY01000123.1 | Eru6  |
| Escherichia coli strain STEC 3031 STEC3031_contig_25, whole genome shotgun sequence  | LOIZ01000129.1 | Eru6  |
| Escherichia coli strain STEC 3039 STEC3039_contig_118, whole genome shotgun sequence | LPUH01000022.1 | Eru6  |
| Escherichia coli strain STEC 3039 STEC3039_contig_29, whole genome shotgun sequence  | LPUH01000108.1 | Eru6  |
| Escherichia coli strain STEC 3055 STEC3055_contig_130, whole genome shotgun sequence | LPUI01000036.1 | ND    |
| Escherichia coli strain STEC 3055 STEC3055_contig_149, whole genome shotgun sequence | LPUI01000056.1 | ND    |
| Escherichia coli strain STEC 3055 STEC3055_contig_201, whole genome shotgun sequence | LPUI01000115.1 | ND    |
| Escherichia coli strain STEC 3098 STEC3098_contig_22, whole genome shotgun sequence  | LPUM01000015.1 | Eru6  |
| Escherichia coli strain STEC 343 contig_50, whole genome shotgun sequence            | LDOZ01000050.1 | ND    |
| Escherichia coli strain STEC 440 440_contig_159, whole genome shotgun sequence       | MRVY01000159.1 | ND    |
| Escherichia coli strain STEC 476-14 476-14_contig_49, whole genome shotgun sequence  | MRVU01000049.1 | Eru7  |
| Escherichia coli strain STEC 479BS2 479BS2_contig_11, whole genome shotgun sequence  | MRVR01000011.1 | Eru7  |
| Escherichia coli strain STEC 480-3 480-3_contig_132, whole genome shotgun sequence   | MRVT01000132.1 | ND    |
| Escherichia coli strain STEC 510-5 510-5_contig_40, whole genome shotgun sequence    | MRVV01000040.1 | Eru7  |
| Escherichia coli strain STEC 514-2 514-2_contig_122, whole genome shotgun sequence   | MRVZ01000122.1 | Eru7  |
| Escherichia coli strain STEC 536-9 Re_536-9_contig_20, whole genome shotgun sequence | MRVS01000020.1 | Eru7  |
| Escherichia coli strain STEC 545 STEC-545_contig_46, whole genome shotgun sequence   | LODB01000401.1 | Eru8  |
| Escherichia coli strain STEC 563 STEC-563_contig_138, whole genome shotgun sequence  | LODD01000044.1 | ND    |
| Escherichia coli strain STEC 563 STEC-563_contig_148, whole genome shotgun sequence  | LODD01000055.1 | ND    |
| Escherichia coli strain STEC 565 STEC565_contig_23, whole genome shotgun sequence    | LODE01000106.1 | Eru2  |
| Escherichia coli strain STEC 573-4 573-4_contig_15, whole genome shotgun sequence    | MRWA01000015.1 | Eru7  |
| Escherichia coli strain STEC 587-5 587-5_contig_81, whole genome shotgun sequence    | MRWB01000081.1 | ND    |
| Escherichia coli strain STEC 587-5 587-5_contig_82, whole genome shotgun sequence    | MRWB01000082.1 | ND    |
| Escherichia coli strain STEC 605 STEC-605_contig_136, whole genome shotgun sequence  | LFUA01000136.1 | ND    |
| Escherichia coli strain STEC 621S1 621S1_contig_13, whole genome shotgun sequence    | MRVX01000013.1 | ND    |
| Escherichia coli strain STEC 623 STEC-623_contig_109, whole genome shotgun sequence  | LFUB01000109.1 | ND    |

|                                                                                      |                |          |
|--------------------------------------------------------------------------------------|----------------|----------|
| Escherichia coli strain STEC 625C-4 625C-4_contig_16, whole genome shotgun sequence  | MRVW01000016.1 | Eru7     |
| Escherichia coli strain STEC 66 STEC-66_contig_79, whole genome shotgun sequence     | LNFT01000172.1 | Eru1     |
| Escherichia coli strain STEC 709 STEC-709_contig_1, whole genome shotgun sequence    | LOFM01000001.1 | Eru1     |
| Escherichia coli strain STEC 709 STEC-709_contig_121, whole genome shotgun sequence  | LOFM01000026.1 | Eru7     |
| Escherichia coli strain STEC 731 STEC-731_contig_50, whole genome shotgun sequence   | LOFN01000117.1 | Eru7     |
| Escherichia coli strain STEC 771 contig_171, whole genome shotgun sequence           | LGAZ01000171.1 | ND       |
| Escherichia coli strain STEC 915 STEC-915_contig_74, whole genome shotgun sequence   | LFUH01000074.1 | ND       |
| Escherichia coli strain STEC 931 STEC-931_contig_69, whole genome shotgun sequence   | LOFS01000183.1 | Eru1     |
| Escherichia coli strain STEC 989 contig_159, whole genome shotgun sequence           | LGBA01000159.1 | ND       |
| Escherichia coli strain STEC 994 contig_120, whole genome shotgun sequence           | LGBB01000120.1 | ND       |
| <b>Stx1</b>                                                                          |                |          |
| Escherichia coli strain STEC 1117 STEC1117_contig_150, whole genome shotgun sequence | LOFU01000058.1 | ND       |
| Escherichia coli strain STEC 1161 STEC1161_contig_128, whole genome shotgun sequence | LOFV01000033.1 | ND       |
| Escherichia coli strain STEC 1188 STEC1188_contig_25, whole genome shotgun sequence  | LOFX01000035.1 | Eru4     |
| Escherichia coli strain STEC 1201 STEC1201_contig_80, whole genome shotgun sequence  | LOFZ01000160.1 | ND       |
| Escherichia coli strain STEC 1225 STEC1225_contig_97, whole genome shotgun sequence  | LOGA01000204.1 | ND       |
| Escherichia coli strain STEC 1236 STEC1236_contig_228, whole genome shotgun sequence | LOGB01000144.1 | ND       |
| Escherichia coli strain STEC 1255 STEC1255_contig_18, whole genome shotgun sequence  | LOGC01000090.1 | ND       |
| Escherichia coli strain STEC 1284 STEC1284_contig_140, whole genome shotgun sequence | LOGE01000047.1 | ND       |
| Escherichia coli strain STEC 1293 STEC1293_contig_188, whole genome shotgun sequence | LOGF01000099.1 | ND       |
| Escherichia coli strain STEC 1299 STEC1299_contig_7, whole genome shotgun sequence   | LOGG01000109.1 | Eru4     |
| Escherichia coli strain STEC 1465 STEC1465_contig_2, whole genome shotgun sequence   | LOGL01000097.1 | Eru1     |
| Escherichia coli strain STEC 1500 STEC1500_contig_18, whole genome shotgun sequence  | LOGN01000031.1 | Eru4     |
| Escherichia coli strain STEC 1506 STEC1506_contig_62, whole genome shotgun sequence  | LPWV01000121.1 | Eru4     |
| Escherichia coli strain STEC 1513 STEC1513_contig_128, whole genome shotgun sequence | LOGO01000033.1 | ND       |
| Escherichia coli strain STEC 1532 STEC1532_contig_89, whole genome shotgun sequence  | LOGQ01000160.1 | lambdoid |
| Escherichia coli strain STEC 1585 STEC1585_contig_10, whole genome shotgun sequence  | LOGR01000002.1 | Eru4     |
| Escherichia coli strain STEC 168 STEC-168_contig_23, whole genome shotgun sequence   | LNJV01000026.1 | Eru4     |
| Escherichia coli strain STEC 1686 STEC1686_contig_68, whole genome shotgun sequence  | LOGT01000167.1 | ND       |
| Escherichia coli strain STEC 169 STEC169_contig_145, whole genome shotgun sequence   | LNZJ01000052.1 | ND       |
| Escherichia coli strain STEC 196 STEC196_contig_6, whole genome shotgun sequence     | LNZK01000067.1 | Eru4     |
| Escherichia coli strain STEC 2064 STEC2064_contig_11, whole genome shotgun sequence  | LOJC01000003.1 | Eru4     |
| Escherichia coli strain STEC 2074 STEC2074_contig_35, whole genome shotgun sequence  | LOJD01000082.1 | Eru4     |
| Escherichia coli strain STEC 2112 contig_161, whole genome shotgun sequence          | LGBE01000161.1 | ND       |
| Escherichia coli strain STEC 2144 STEC2144_contig_132, whole genome shotgun sequence | LOGU01000038.1 | lambdoid |
| Escherichia coli strain STEC 2174 STEC2174_contig_4, whole genome shotgun sequence   | LOGV01000046.1 | Eru4     |
| Escherichia coli strain STEC 2193 STEC2193_contig_13, whole genome shotgun sequence  | LOGW01000035.1 | lambdoid |
| Escherichia coli strain STEC 2211 STEC2211_contig_137, whole genome shotgun sequence | LOGX01000043.1 | ND       |
| Escherichia coli strain STEC 2257 contig_143, whole genome shotgun sequence          | LGBF01000143.1 | ND       |
| Escherichia coli strain STEC 2270 STEC2270_contig_37, whole genome shotgun sequence  | LPWX01000147.1 | ND       |
| Escherichia coli strain STEC 2346 STEC2346_contig_159, whole genome shotgun sequence | LOHA01000067.1 | ND       |

|                                                                                      |                |          |
|--------------------------------------------------------------------------------------|----------------|----------|
| Escherichia coli strain STEC 2359 STEC2359_contig_30, whole genome shotgun sequence  | LOHB01000024.1 | ND       |
| Escherichia coli strain STEC 2363 STEC2363_contig_20, whole genome shotgun sequence  | LPWY01000046.1 | Eru4     |
| Escherichia coli strain STEC 2419 STEC2419_contig_65, whole genome shotgun sequence  | LPWZ01000120.1 | lambdoid |
| Escherichia coli strain STEC 2441 STEC2441_contig_165, whole genome shotgun sequence | LOHC01000074.1 | ND       |
| Escherichia coli strain STEC 2450 STEC2450_contig_19, whole genome shotgun sequence  | LPXA01000101.1 | Eru4     |
| Escherichia coli strain STEC 2499 STEC2499_contig_39, whole genome shotgun sequence  | LOIE01000066.1 | Eru7     |
| Escherichia coli strain STEC 2505 STEC2505_contig_22, whole genome shotgun sequence  | LPXB01000098.1 | Eru4     |
| Escherichia coli strain STEC 2564 STEC2564_contig_44, whole genome shotgun sequence  | LOIG01000176.1 | Eru1     |
| Escherichia coli strain STEC 2573 STEC2573_contig_61, whole genome shotgun sequence  | LOIH01000106.1 | ND       |
| Escherichia coli strain STEC 2591 STEC2591_contig_23, whole genome shotgun sequence  | LOII01000032.1 | Eru7     |
| Escherichia coli strain STEC 2620 STEC2620_contig_99, whole genome shotgun sequence  | LPXC01000234.1 | ND       |
| Escherichia coli strain STEC 2633 STEC2633_contig_39, whole genome shotgun sequence  | LOIK01000066.1 | Eru5     |
| Escherichia coli strain STEC 2667 contig_141, whole genome shotgun sequence          | LGBH01000141.1 | ND       |
| Escherichia coli strain STEC 2708 STEC2708_contig_138, whole genome shotgun sequence | LOIL01000044.1 | ND       |
| Escherichia coli strain STEC 2743 STEC2743_contig_90, whole genome shotgun sequence  | LOIM01000198.1 | ND       |
| Escherichia coli strain STEC 2746 STEC2746_contig_26, whole genome shotgun sequence  | LPXD01000109.1 | Eru4     |
| Escherichia coli strain STEC 2764 STEC2764_contig_63, whole genome shotgun sequence  | LOIN01000127.1 | Eru4     |
| Escherichia coli strain STEC 2770 STEC2770_contig_19, whole genome shotgun sequence  | LPXF01000089.1 | ND       |
| Escherichia coli strain STEC 2788 STEC2788_contig_39, whole genome shotgun sequence  | LOIO01000033.1 | Eru4     |
| Escherichia coli strain STEC 2820 contig_76, whole genome shotgun sequence           | LGBQ01000076.1 | ND       |
| Escherichia coli strain STEC 2821 contig_145, whole genome shotgun sequence          | LGBI01000145.1 | ND       |
| Escherichia coli strain STEC 2839 STEC2839_contig_22, whole genome shotgun sequence  | LOJB01000015.1 | Eru4     |
| Escherichia coli strain STEC 2841 STEC2841_contig_11, whole genome shotgun sequence  | LOIQ01000003.1 | Eru4     |
| Escherichia coli strain STEC 2868 contig_84, whole genome shotgun sequence           | LGBJ01000084.1 | ND       |
| Escherichia coli strain STEC 2894.1 2894-1_contig_38, whole genome shotgun sequence  | LOIS01000032.1 | Eru5     |
| Escherichia coli strain STEC 29 STEC-29_contig_6, whole genome shotgun sequence      | LNFU01000056.1 | Eru4     |
| Escherichia coli strain STEC 2920 STEC2920_contig_172, whole genome shotgun sequence | LOIU01000082.1 | ND       |
| Escherichia coli strain STEC 2938 STEC2938_contig_47, whole genome shotgun sequence  | LOIV01000111.1 | ND       |
| Escherichia coli strain STEC 2953 STEC2953_contig_44, whole genome shotgun sequence  | LOIW01000078.1 | Eru4     |
| Escherichia coli strain STEC 2954 STEC2954_contig_9, whole genome shotgun sequence   | LPXE01000152.1 | Eru4     |
| Escherichia coli strain STEC 2962 STEC2962_contig_4, whole genome shotgun sequence   | LOIX01000034.1 | Eru4     |
| Escherichia coli strain STEC 2980 STEC2980_contig_92, whole genome shotgun sequence  | LOIY01000194.1 | Eru4     |
| Escherichia coli strain STEC 299 STEC299_contig_145, whole genome shotgun sequence   | LOCR01000052.1 | ND       |
| Escherichia coli strain STEC 3031 STEC3031_contig_24, whole genome shotgun sequence  | LOIZ01000128.1 | Eru4     |
| Escherichia coli strain STEC 3039 STEC3039_contig_100, whole genome shotgun sequence | LPUH01000003.1 | ND       |
| Escherichia coli strain STEC 3055 STEC3055_contig_65, whole genome shotgun sequence  | LPUJ01000214.1 | Eru1     |
| Escherichia coli strain STEC 3084 STEC3084_contig_28, whole genome shotgun sequence  | LPUJ01000040.1 | Eru4     |
| Escherichia coli strain STEC 3087 STEC3087_contig_27, whole genome shotgun sequence  | LPUK01000020.1 | Eru4     |
| Escherichia coli strain STEC 3094 STEC3094_contig_88, whole genome shotgun sequence  | LPUL01000162.1 | ND       |
| Escherichia coli strain STEC 3106 STEC3106_contig_9, whole genome shotgun sequence   | LPUN01000125.1 | Eru4     |
| Escherichia coli strain STEC 329 STEC329_contig_68, whole genome shotgun sequence    | LOCT01000103.1 | Eru4     |

|                                                                                     |                |          |
|-------------------------------------------------------------------------------------|----------------|----------|
| Escherichia coli strain STEC 370 STEC370_contig_124, whole genome shotgun sequence  | LOCU01000029.1 | ND       |
| Escherichia coli strain STEC 380 STEC380_contig_200, whole genome shotgun sequence  | LOCV01000114.1 | ND       |
| Escherichia coli strain STEC 384 STEC384_contig_129, whole genome shotgun sequence  | LOCW01000034.1 | ND       |
| Escherichia coli strain STEC 440 440_contig_83, whole genome shotgun sequence       | MRVY01000083.1 | ND       |
| Escherichia coli strain STEC 464 STEC464_contig_70, whole genome shotgun sequence   | LOCX01000131.1 | ND       |
| Escherichia coli strain STEC 477 STEC477_contig_83, whole genome shotgun sequence   | LOCY01000237.1 | ND       |
| Escherichia coli strain STEC 479 STEC479_contig_147, whole genome shotgun sequence  | LOCZ01000054.1 | ND       |
| Escherichia coli strain STEC 487 STEC487_contig_273, whole genome shotgun sequence  | LODA01000194.1 | ND       |
| Escherichia coli strain STEC 559 STEC559_contig_57, whole genome shotgun sequence   | LODC01000145.1 | lambdoid |
| Escherichia coli strain STEC 563 STEC-563_contig_155, whole genome shotgun sequence | LODD01000063.1 | ND       |
| Escherichia coli strain STEC 621S1 621S1_contig_12, whole genome shotgun sequence   | MRVX01000012.1 | ND       |
| Escherichia coli strain STEC 623 STEC-623_contig_46, whole genome shotgun sequence  | LFUB01000046.1 | ND       |
| Escherichia coli strain STEC 627 STEC627_contig_98, whole genome shotgun sequence   | LODF01000184.1 | ND       |
| Escherichia coli strain STEC 645 STEC645_contig_5, whole genome shotgun sequence    | LODG01000045.1 | Eru4     |
| Escherichia coli strain STEC 66 STEC-66_contig_78, whole genome shotgun sequence    | LNFT01000171.1 | ND       |
| Escherichia coli strain STEC 690 STEC690_contig_253, whole genome shotgun sequence  | LOFJ01000172.1 | ND       |
| Escherichia coli strain STEC 691 STEC691_contig_122, whole genome shotgun sequence  | LOFK01000027.1 | ND       |
| Escherichia coli strain STEC 707 STEC707_contig_88, whole genome shotgun sequence   | LOFL01000143.1 | ND       |
| Escherichia coli strain STEC 709 STEC-709_contig_147, whole genome shotgun sequence | LOFM01000054.1 | ND       |
| Escherichia coli strain STEC 757 STEC757_contig_136, whole genome shotgun sequence  | LOFO01000042.1 | ND       |
| Escherichia coli strain STEC 764 STEC764_contig_242, whole genome shotgun sequence  | LOFP01000160.1 | ND       |
| Escherichia coli strain STEC 771 contig_117, whole genome shotgun sequence          | LGAZ01000117.1 | ND       |
| Escherichia coli strain STEC 886 STEC886_contig_19, whole genome shotgun sequence   | LOFR01000041.1 | Eru4     |
| Escherichia coli strain STEC 915 STEC-915_contig_344, whole genome shotgun sequence | LFUH01000344.1 | ND       |
| Escherichia coli strain STEC 989 contig_82, whole genome shotgun sequence           | LGBA01000082.1 | ND       |

## PRJEB6447

### Norwegian STEC isolates

| Strain      | NCBI Accession no | Eru type |
|-------------|-------------------|----------|
| <b>Stx2</b> |                   |          |
| FHI3        | CCPT01000144.1    | Eru7     |
| FHI4        | LM995944.1        | Eru7     |
| FHI5        | CCQC01000098.1    | ND       |
| FHI6        | LM996356.1        | Eru1     |
| FHI7        | LM996408.1        | Eru1     |
| FHI9        | LM997071.1        | Eru1     |
| FHI12       | LM995551.1        | Eru1     |
| FHI19       | CCPR01000384.1    | Eru1     |
| FHI22       | CCPS01000056.1    | ND       |
| FHI24       | LM995744.1        | Eru1     |
| FHI25       | LM996297.1        | Eru7     |
| FHI27       | LM995668.1        | Eru1     |

|             |                |               |
|-------------|----------------|---------------|
| FHI28       | LM995766.1     | ND            |
| FHI30       | LM995896.1     | Eru10         |
| FHI31       | CCVO01000012.1 | ND            |
| FHI32       | CCVP01000063.1 | ND            |
| FHI35       | CCQJ01000092.1 | ND            |
| FHI36       | CCPV01000170.1 | Eru1          |
| FHI37       | CCPU01000077.1 | ND            |
| FHI39       | CCPX01000131.1 | Eru6          |
| FHI41       | CCPY01000042.1 | lambdoid      |
| FHI42       | LK999941.1     | ND            |
| FHI43       | LM996066.1     | Eru7          |
| FHI48       | LM996025.1     | Eru7<br>(HUS) |
| FHI49       | CCQB01000137.1 | ND            |
| FHI53       | CCRA01000038.1 | Eru6          |
| FHI58       | LM995979.1     | ND<br>(HUS)   |
| FHI59       | LK999983.1     | Eru6          |
| FHI62       | LN554923.1     | Eru7          |
| FHI63       | LM996460.1     | Eru7<br>(HUS) |
| FHI65       | LM996529.1     | Eru6          |
| FHI71       | LM996832.1     | Eru6          |
| FHI79       | LM996682.1     | ND<br>(HUS)   |
| FHI8        | LM996720.1     | Eru1<br>(HUS) |
| FHI81       | CCQV01000126.1 | ND            |
| FHI82       | LM996798.1     | Eru7          |
| FHI83       | LM996896.1     | Eru2<br>(HUS) |
| FHI85       | LM996947.1     | Eru1          |
| FHI86       | CCRC01000097.1 | Eru1          |
| FHI88       | CCQX01000142.1 | ND            |
| FHI89       | LM997036.1     | Eru6          |
| FHI92       | LM997161.1     | Eru7          |
| FHI95       | CCRD01000099.1 | Eru7          |
| FHI98       | LM997367.1     | Eru10         |
| FHI99       | LM997254.1     | Eru13         |
| FHI100      | LK985420.1     | Eru8          |
| FHI101      | CCPP01000171.1 | Eru7          |
| FHI102      | LM995495.1     | Eru1<br>(HUS) |
| StOlav104   | LK931573.1     | Eru7          |
| St. Olav164 | PVRW01000040.1 | Eru7          |
| <b>Stx1</b> |                |               |
| FHI1        | CCPO01000158.1 | ND            |

|       |                |               |
|-------|----------------|---------------|
| FHI5  | CCQC01000109.1 | ND            |
| FHI6  | LM996340.1     | ND<br>(HUS)   |
| FHI7  | LM996413.1     | Eru4<br>(HUS) |
| FHI20 | LM995817.1     | ND            |
| FHI22 | CCPS01000094.1 | Eru4          |
| FHI23 | NZ_LM995659.1  | Eru12         |
| FHI29 | LM995865.1     | Eru4          |
| FHI30 | LM995905.1     | Eru4          |
| FHI32 | CCVP01000073.1 | Eru12         |
| FHI34 | LM996489.1     | Eru4          |
| FHI37 | CCPU01000123.1 | ND            |
| FHI40 | LM996246.1     | ND            |
| FHI45 | CCQM01000063.1 | Eru4          |
| FHI46 | CCPZ01000238.1 | ND            |
| FHI47 | CCQA01000072.1 | Eru6          |
| FHI49 | CCQB01000089.1 | Eru4          |
| FHI50 | CCQD01000134.1 | Eru6          |
| FHI51 | CCQW01000128.1 | ND            |
| FHI52 | CCQH01000128.1 | ND            |
| FHI54 | CCQI01000086.1 | ND            |
| FHI56 | CCQK01000110.1 | ND            |
| FHI60 | CCRB01000131.1 | ND            |
| FHI61 | CCQL01000336.1 | ND            |
| FHI64 | CCQN01000148.1 | ND            |
| FHI65 | LM996514.1     | Eru1          |
| FHI67 | CCQO01000029.1 | ND            |
| FHI68 | CCQQ01000131.1 | Eru1          |
| FHI69 | CCQP01000089.1 | Eru4          |
| FHI70 | LM997107.1     | Eru2          |
| FHI72 | LM996870.1     | Eru1          |
| FHI74 | LM996604.1     | Eru5          |
| FHI75 | LM996630.1     | ND            |
| FHI76 | CCQT01000162.1 | ND            |
| FHI77 | CCQS01000108.1 | ND            |
| FHI78 | CCQU01000036.1 | ND            |
| FHI81 | CCQV01000151.1 | Eru1          |
| FHI84 | CCVQ01000033.1 | ND            |
| FHI85 | LM996969.1     | ND            |
| FHI87 | LM996984.1     | ND            |
| FHI90 | LM997295.1     | ND            |
| FHI92 | LM997172.1     | Eru4          |

|                                                                                              |                              |                     |
|----------------------------------------------------------------------------------------------|------------------------------|---------------------|
| FHI93                                                                                        | CCQY01000267.1               | ND                  |
| FHI96                                                                                        | CCRE01000139.1               | Eru4                |
| FHI97                                                                                        | LM997224.1                   | lambdoid            |
| St. Olav143                                                                                  | CCVR01000362.1               | ND                  |
| <b>PRJNA706995</b>                                                                           |                              |                     |
| <b>Shiga-toxin-producing <i>Escherichia coli</i> carriage in asymptomatic French infants</b> |                              |                     |
| <b>Strain</b>                                                                                | <b>NCBI<br/>Accession no</b> | <b>Eru<br/>type</b> |
| <b>Stx2</b>                                                                                  |                              |                     |
| Escherichia coli strain 172124GE NODE_96_259616.007695, whole genome shotgun sequence        | JAFMZRO10000326.1            | ND                  |
| Escherichia coli strain 192068CE NODE_18_9463935.066618, whole genome shotgun sequence       | JAFMZOX010000018.1           | Eru7                |
| Escherichia coli strain 182303EI NODE_70377111.543908, whole genome shotgun sequence         | JAFMZU010000233.1            | ND                  |
| Escherichia coli strain 172332DM NODE_73_403113.378842, whole genome shotgun sequence        | JAFMZS010000271.1            | ND                  |
| Escherichia coli strain 182769NA NODE_67_1551313.870207, whole genome shotgun sequence       | JAFMZW010000381.1            | Eru7                |
| Escherichia coli strain 172669GA NODE_53_1898931.577163, whole genome shotgun sequence       | JAFMZT010000053.1            | Eru6                |
| <b>Stx1</b>                                                                                  |                              |                     |
| Escherichia coli strain 192068CE NODE_23_7894751.250875, whole genome shotgun sequence       | JAFMZOX010000023.1           | lambdoid            |
| Escherichia coli strain 192161DA NODE_83_706311.409746, whole genome shotgun sequence        | JAFMZYO10000402.1            | ND                  |
| Escherichia coli strain 182629BE NODE_112344714.641566, whole genome shotgun sequence        | JAFMZV010000014.1            | ND                  |
| <b>PRJNA694525</b>                                                                           |                              |                     |
| <b>STEC isolated from raw meat-based diets for companion animals in Switzerland</b>          |                              |                     |
| <b>Strain</b>                                                                                | <b>NCBI<br/>Accession no</b> | <b>Eru<br/>type</b> |
| <b>Stx2</b>                                                                                  |                              |                     |
| Escherichia coli strain ATB6-118 contig00027, whole genome shotgun sequence                  | JAEUYO010000027.1            | ND                  |
| Escherichia coli strain LSC6-3 contig00094, whole genome shotgun sequence                    | JAETZC010000094.1            | ND                  |
| Escherichia coli strain ATC45-11 contig00118, whole genome shotgun sequence                  | JAETYS010000118.1            | ND                  |
| Escherichia coli strain ATC46-2 contig00088, whole genome shotgun sequence                   | JAETYT010000088.1            | ND                  |
| Escherichia coli strain ATC-9-6 contig00064, whole genome shotgun sequence                   | JAETYO010000064.1            | ND                  |
| Escherichia coli strain ATC-44-40 contig00081, whole genome shotgun sequence                 | JAETYM010000081.1            | ND                  |
| Escherichia coli strain ATB47-1 contig00030, whole genome shotgun sequence                   | JAETYG010000030.1            | lambdoid            |
| Escherichia coli strain ATB-15-29 contig00069, whole genome shotgun sequence                 | JAETYB010000069.1            | ND                  |
| Escherichia coli strain LSB-2-42b contig00018, whole genome shotgun sequence                 | JAETYW010000018.1            | Eru8                |
| Escherichia coli strain LSB-2-27b contig00019, whole genome shotgun sequence                 | JAETYV010000019.1            | Eru8                |
| Escherichia coli strain ATC-B-20-47 contig00012, whole genome shotgun sequence               | JAETYP010000012.1            | Eru1                |
| Escherichia coli strain ATC-21-17 contig00069, whole genome shotgun sequence                 | JAETYJ010000069.1            | ND                  |
| Escherichia coli strain ATC-11-10 contig00077, whole genome shotgun sequence                 | JAETYH010000077.1            | ND                  |
| Escherichia coli strain ATB-21-84 contig00067, whole genome shotgun sequence                 | JAETYC010000067.1            | ND                  |
| Escherichia coli strain ATC39-3 contig00011, whole genome shotgun sequence                   | JAETYR010000011.1            | ND                  |
| Escherichia coli strain ATB-39-11 contig00011, whole genome shotgun sequence                 | JAETYE010000011.1            | ND                  |
| Escherichia coli strain ATB-11-12 contig00046, whole genome shotgun sequence                 | JAETXZ010000046.1            | Eru10               |

|                                                                                    |                              |                     |
|------------------------------------------------------------------------------------|------------------------------|---------------------|
| Escherichia coli strain LSC6-3 contig00029, whole genome shotgun sequence          | JAETZC010000029.1            | Eru10               |
| Escherichia coli strain ATB-23-31c contig00161, whole genome shotgun sequence      | JAETYD010000161.1            | ND                  |
| Escherichia coli strain ATB-10-31 contig00098, whole genome shotgun sequence       | JAETXY010000098.1            | ND                  |
| Escherichia coli strain LSC1-58 contig00138, whole genome shotgun sequence         | JAETYZ010000138.1            | ND                  |
| Escherichia coli strain ATC7-7 contig00075, whole genome shotgun sequence          | JAETYU010000075.1            | ND                  |
| Escherichia coli strain ATC-41-3 contig00056, whole genome shotgun sequence        | JAETYL010000056.1            | Eru6                |
| Escherichia coli strain ATC-49-13 contig00211, whole genome shotgun sequence       | JAETYN010000211.1            | ND                  |
| Escherichia coli strain ATB29-1 contig00211, whole genome shotgun sequence         | JAETYF010000211.1            | ND                  |
| Escherichia coli strain LSC1-P21-24 contig00207, whole genome shotgun sequence     | JAETZB010000207.1            | ND                  |
| Escherichia coli strain LSB-P21-51 contig00208, whole genome shotgun sequence      | JAETYX010000208.1            | ND                  |
| Escherichia coli strain LSC1-P21-24 contig00170, whole genome shotgun sequence     | JAETZB010000170.1            | ND                  |
| Escherichia coli strain LSC1-P21-24 contig00095, whole genome shotgun sequence     | JAETZB010000095.1            | ND                  |
| Escherichia coli strain LSB-P21-51 contig00187, whole genome shotgun sequence      | JAETYX010000187.1            | ND                  |
| Escherichia coli strain ATB29-1 contig00181, whole genome shotgun sequence         | JAETYF010000181.1            | ND                  |
| Escherichia coli strain LSB-P21-51 contig00243, whole genome shotgun sequence      | JAETYX010000243.1            | ND                  |
| Escherichia coli strain ATB29-1 contig00102, whole genome shotgun sequence         | JAETYF010000102.1            | ND                  |
| Escherichia coli strain ATC-49-13 contig00089, whole genome shotgun sequence       | JAETYN010000089.1            | ND                  |
| <b>Stx1</b>                                                                        |                              |                     |
| Escherichia coli strain ATB6-118 contig00001, whole genome shotgun sequence        | JAEUYO010000001.1            | Eru4                |
| Escherichia coli strain LSC1-P21-24 contig00106, whole genome shotgun sequence     | JAETZB010000106.1            | ND                  |
| Escherichia coli strain LSB-P21-51 contig00108, whole genome shotgun sequence      | JAETYX010000108.1            | ND                  |
| Escherichia coli strain ATC-4-67 contig00017, whole genome shotgun sequence        | JAETYK010000017.1            | Eru1                |
| Escherichia coli strain ATC-15-17 contig00026, whole genome shotgun sequence       | JAETYI010000026.1            | Eru1                |
| Escherichia coli strain ATB29-1 contig00088, whole genome shotgun sequence         | JAETYF010000088.1            | ND                  |
| Escherichia coli strain ATB-23-31c contig00074, whole genome shotgun sequence      | JAETYD010000074.1            | ND                  |
| Escherichia coli strain ATC45-11 contig00091, whole genome shotgun sequence        | JAETYS010000091.1            | ND                  |
| Escherichia coli strain LSC1-7 contig00009, whole genome shotgun sequence          | JAETZA010000009.1            | Eru4                |
| Escherichia coli strain LSC1-58 contig00032, whole genome shotgun sequence         | JAETYZ010000032.1            | Eru4                |
| Escherichia coli strain LSC-5-20 contig00002, whole genome shotgun sequence        | JAETYY010000002.1            | Eru4                |
| Escherichia coli strain ATC7-7 contig00018, whole genome shotgun sequence          | JAETYU010000018.1            | Eru4                |
| Escherichia coli strain ATC36-6 contig00045, whole genome shotgun sequence         | JAETYQ010000045.1            | Eru4                |
| Escherichia coli strain ATB-14-66 contig00007, whole genome shotgun sequence       | JAETYA010000007.1            | Eru4                |
| Escherichia coli strain ATB-10-31 contig00022, whole genome shotgun sequence       | JAETXY010000022.1            | Eru4                |
| Escherichia coli strain ATB-23-31c contig00152, whole genome shotgun sequence      | JAETYD010000152.1            | ND                  |
| Escherichia coli strain ATB-23-31c contig00037, whole genome shotgun sequence      | JAETYD010000037.1            |                     |
| <b>PRJNA680568</b>                                                                 |                              |                     |
| <b><i>Escherichia coli</i> O80:H2 strains from Switzerland</b>                     |                              |                     |
| <b>Strain</b>                                                                      | <b>NCBI<br/>Accession no</b> | <b>Eru<br/>type</b> |
| <b>Stx2</b>                                                                        |                              |                     |
| Escherichia coli strain 1970-08 1970-08_contig00121, whole genome shotgun sequence | JAEANL010000121.1            | ND                  |
| Escherichia coli strain S18-215 S18-215_contig00116, whole genome shotgun sequence | JAEANI010000116.1            | ND                  |

|                                                                                              |                   |      |
|----------------------------------------------------------------------------------------------|-------------------|------|
| Escherichia coli strain S19-18-1 S19-18_contig00081, whole genome shotgun sequence           | JAEANE010000081.1 | Eru7 |
| Escherichia coli strain S19-2-2 S19-2_contig00118, whole genome shotgun sequence             | JAEAND010000118.1 | ND   |
| Escherichia coli strain S19-64-1 S19-64_contig00113, whole genome shotgun sequence           | JAEANA010000113.1 | ND   |
| Escherichia coli strain S19-677-1 S19-677_contig00129, whole genome shotgun sequence         | JAEAMZ010000129.1 | ND   |
| Escherichia coli strain 2018-226 STEC2018-226_contig00117, whole genome shotgun sequence     | JAEAMV010000117.1 | ND   |
| Escherichia coli strain 1384-03 1384-03_contig00133, whole genome shotgun sequence           | JAEAMT010000133.1 | ND   |
| Escherichia coli strain P17-291 P17-291_contig00069, whole genome shotgun sequence           | JAEANK010000069.1 | Eru7 |
| Escherichia coli strain S18-168 S18-168_contig00068, whole genome shotgun sequence           | JAEANJ010000068.1 | Eru7 |
| Escherichia coli strain S18-73 S18-73_contig00067, whole genome shotgun sequence             | JAEANH010000067.1 | Eru7 |
| Escherichia coli strain S18-9-1 S18-9-1_contig00064, whole genome shotgun sequence           | JAEANG010000064.1 | Eru7 |
| Escherichia coli strain S19-101-1 S19-101_contig00070, whole genome shotgun sequence         | JAEANF010000070.1 | Eru7 |
| Escherichia coli strain S19-30-1 S19-30_contig00071, whole genome shotgun sequence           | JAEANC010000071.1 | Eru7 |
| Escherichia coli strain S19-615-1 S19-615_contig00066, whole genome shotgun sequence         | JAEANB010000066.1 | Eru7 |
| Escherichia coli strain S19-710-1 S19-710_contig00078, whole genome shotgun sequence         | JAEAMY010000078.1 | Eru7 |
| Escherichia coli strain 2017-299-1 STEC2017-299-1_contig00071, whole genome shotgun sequence | JAEAMX010000071.1 | Eru7 |
| Escherichia coli strain 2017-353-1 STEC2017-353-1_contig00071, whole genome shotgun sequence | JAEAMW010000071.1 | Eru7 |
| Escherichia coli strain 2018-439 STEC2018-439_contig00071, whole genome shotgun sequence     | JAEAMU010000071.1 | Eru7 |

### PRJNA666781

#### STEC strains isolated from semi-hard raw milk cheese from Italy

| Strain                                                                               | NCBI Accession no | Eru type |
|--------------------------------------------------------------------------------------|-------------------|----------|
| <b>Stx2</b>                                                                          |                   |          |
| Escherichia coli strain UC4128 STEC_UC4128_contig_75, whole genome shotgun sequence  | JACZIB010000075.1 | ND       |
| Escherichia coli strain UC4130 STEC_UC4130_contig_74, whole genome shotgun sequence  | JACZH010000074.1  | ND       |
| Escherichia coli strain UC4131 STEC_UC4131_contig_186, whole genome shotgun sequence | JACZHY010000186.1 | ND       |
| Escherichia coli strain UC4132 STEC_UC4132_contig_74, whole genome shotgun sequence  | JACZHX010000074.1 | ND       |
| Escherichia coli strain UC4129 STEC_UC4129_contig_26, whole genome shotgun sequence  | JACZIA010000026.1 | ND       |
| Escherichia coli strain UC4133 STEC_UC4133_contig_57, whole genome shotgun sequence  | JACZHW010000057.1 | ND       |
| Escherichia coli strain UC4134 STEC_UC4134_contig_28, whole genome shotgun sequence  | JACZHV010000028.1 | ND       |

#### Stx1

|                                                                                     |                   |      |
|-------------------------------------------------------------------------------------|-------------------|------|
| Escherichia coli strain UC4128 STEC_UC4128_contig_17, whole genome shotgun sequence | JACZIB010000017.1 | Eru7 |
| Escherichia coli strain UC4130 STEC_UC4130_contig_17, whole genome shotgun sequence | JACZH010000017.1  | Eru7 |
| Escherichia coli strain UC4131 STEC_UC4131_contig_23, whole genome shotgun sequence | JACZHY010000023.1 | Eru7 |
| Escherichia coli strain UC4132 STEC_UC4132_contig_17, whole genome shotgun sequence | JACZHX010000017.1 | Eru7 |

### PRJNA248042

#### National Surveillance of STEC O157:H7 in England

| Strain                                                                                               | NCBI Accession no | Eru type |
|------------------------------------------------------------------------------------------------------|-------------------|----------|
| <b>Stx2</b>                                                                                          |                   |          |
| Escherichia coli strain H121560360 SAMN03492009-rid9085603.guided.356, whole genome shotgun sequence | AAVVNG010000004.1 | Eru1     |
| Escherichia coli strain H121560360 SAMN03492009-rid9085603.denovo.333, whole genome shotgun sequence | AAVVVC010000003.1 | Eru1     |

|                                                                                                      |                  |      |
|------------------------------------------------------------------------------------------------------|------------------|------|
| Escherichia coli strain H132920427 SAMN03485820-rid9085393.guided.134, whole genome shotgun sequence | AAVVM01000010.1  | Eru2 |
| Escherichia coli strain H121780072 SAMN03492023-rid9085623.guided.351, whole genome shotgun sequence | AAVVLZ01000015.1 | Eru7 |
| Escherichia coli strain H053000190 SAMN03491912-rid9085593.guided.151, whole genome shotgun sequence | AAVVM01000016.1  | Eru2 |
| Escherichia coli strain H054440305 SAMN03492026-rid9085653.guided.207, whole genome shotgun sequence | AAVVQR01000015.1 | Eru2 |
| Escherichia coli strain H063100370 SAMN03492028-rid9085673.guided.184, whole genome shotgun sequence | AAVVUX01000016.1 | Eru7 |
| Escherichia coli strain H063100370 SAMN03492028-rid9085673.denovo.134, whole genome shotgun sequence | AAVVM01000018.1  | Eru7 |
| Escherichia coli strain H094000293 SAMN03492031-rid9085703.guided.352, whole genome shotgun sequence | AAVVOA01000015.1 | Eru7 |
| Escherichia coli strain H102620398 SAMN03492030-rid9085693.guided.275, whole genome shotgun sequence | AAVVVF01000015.1 | Eru7 |
| Escherichia coli strain H094000312 SAMN03492036-rid9085733.guided.276, whole genome shotgun sequence | AAVVXZ01000026.1 | Eru7 |
| Escherichia coli strain H094000312 SAMN03492036-rid9085733.denovo.205, whole genome shotgun sequence | AAVVS01000026.1  | Eru7 |
| Escherichia coli strain H063160363 SAMN03492043-rid9085743.guided.172, whole genome shotgun sequence | AAVVJN01000025.1 | Eru7 |
| Escherichia coli strain H123780462 SAMN03492044-rid9085793.guided.166, whole genome shotgun sequence | AAVVRM01000028.1 | Eru7 |
| Escherichia coli strain H122440404 SAMN03492048-rid9085833.guided.183, whole genome shotgun sequence | AAVVK01000025.1  | Eru7 |
| Escherichia coli strain H101980207 SAMN03492054-rid9085873.guided.281, whole genome shotgun sequence | AAVVKJ01000028.1 | Eru7 |
| Escherichia coli strain H043240557 SAMN03492051-rid9085843.guided.166, whole genome shotgun sequence | AAVVVB01000025.1 | Eru7 |
| Escherichia coli strain H123760762 SAMN03492056-rid9085893.guided.229, whole genome shotgun sequence | AAVVTZ01000010.1 | Eru7 |
| Escherichia coli strain H123900440 SAMN03492059-rid9085923.guided.177, whole genome shotgun sequence | AAVVXJ01000022.1 | Eru7 |
| Escherichia coli strain H052720465 SAMN03492060-rid9085933.guided.155, whole genome shotgun sequence | AAVVSU01000026.1 | Eru7 |
| Escherichia coli strain H091920551 SAMN03492063-rid9085963.guided.147, whole genome shotgun sequence | AAVVKR01000027.1 | Eru7 |
| Escherichia coli strain H123800424 SAMN03492066-rid9085993.guided.242, whole genome shotgun sequence | AATHXA01000027.1 | Eru7 |
| Escherichia coli strain H123180903 SAMN03492072-rid9086023.guided.415, whole genome shotgun sequence | AAVVGX01000027.1 | Eru7 |
| Escherichia coli strain H123820316 SAMN03492078-rid9086073.guided.372, whole genome shotgun sequence | AAVVVU01000025.1 | Eru7 |
| Escherichia coli strain H112340317 SAMN03492067-rid9086003.guided.165, whole genome shotgun sequence | AAVVS01000029.1  | Eru1 |
| Escherichia coli strain H121620527 SAMN03492083-rid9086123.guided.165, whole genome shotgun sequence | AAVVMJ01000033.1 | Eru1 |
| Escherichia coli strain H122880422 SAMN03492081-rid9086103.guided.165, whole genome shotgun sequence | AAVVDW01000029.1 | Eru1 |
| Escherichia coli strain H122460748 SAMN03492087-rid9086143.guided.166, whole genome shotgun sequence | AAVVRE01000037.1 | Eru1 |
| Escherichia coli strain H120540363 SAMN03492095-rid9086193.guided.169, whole genome shotgun sequence | AAVVTU01000036.1 | Eru1 |
| Escherichia coli strain H123400303 SAMN03492107-rid9086273.guided.290, whole genome shotgun sequence | AAVVFF01000037.1 | Eru1 |
| Escherichia coli strain H122920156 SAMN03492121-rid9086373.guided.438, whole genome shotgun sequence | AATHXD01000066.1 | Eru1 |
| Escherichia coli strain H102820427 SAMN03492123-rid9086393.guided.210, whole genome shotgun sequence | AATHXU01000060.1 | Eru1 |
| Escherichia coli strain H121620525 SAMN03492115-rid9086343.guided.168, whole genome shotgun sequence | AAVVTX01000050.1 | Eru5 |
| Escherichia coli strain H093940423 SAMN03492129-rid9086443.guided.195, whole genome shotgun sequence | AAVVMY01000048.1 | Eru7 |
| Escherichia coli strain H132040221 SAMN03492131-rid9086463.guided.169, whole genome shotgun sequence | AAVVT01000053.1  | Eru1 |
| Escherichia coli strain H123960525 SAMN03492134-rid9086493.guided.198, whole genome shotgun sequence | AAVVL01000073.1  | Eru1 |

|                                                                                                      |                   |          |
|------------------------------------------------------------------------------------------------------|-------------------|----------|
| Escherichia coli strain H121320380 SAMN03492135-rid9086503.guided.140, whole genome shotgun sequence | AAVVOD010000067.1 | Eru1     |
| Escherichia coli strain H121320380 SAMN03492135-rid9086503.denovo.082, whole genome shotgun sequence | AATHWY010000053.1 | Eru7     |
| Escherichia coli strain H122900266 SAMN03492148-rid9086603.guided.215, whole genome shotgun sequence | AAVVQZ010000056.1 | Eru7     |
| Escherichia coli strain H123480455 SAMN03492142-rid9086553.guided.197, whole genome shotgun sequence | AAVVED010000052.1 | Eru5     |
| Escherichia coli strain H123740302 SAMN03492155-rid9086673.guided.274, whole genome shotgun sequence | AAVVTC010000107.1 | Eru1     |
| Escherichia coli strain H123540543 SAMN03492158-rid9086703.guided.208, whole genome shotgun sequence | AAVVWC010000072.1 | Eru7     |
| Escherichia coli strain H121600272 SAMN03492156-rid9086683.guided.223, whole genome shotgun sequence | AAVVIM010000068.1 | Eru7     |
| Escherichia coli strain H123680777 SAMN03492169-rid9086783.guided.153, whole genome shotgun sequence | AAVVJS010000064.1 | Eru1     |
| Escherichia coli strain H121980151 SAMN03492170-rid9086793.guided.159, whole genome shotgun sequence | AAVVF010000056.1  | Eru1     |
| Escherichia coli strain H122860601 SAMN03492171-rid9086803.guided.179, whole genome shotgun sequence | AAVVXH010000123.1 | Eru7     |
| Escherichia coli strain H122920157 SAMN03492172-rid9086813.guided.176, whole genome shotgun sequence | AAVVEV010000056.1 | Eru1     |
| Escherichia coli strain H134240606 SAMN03492175-rid9086843.guided.135, whole genome shotgun sequence | AAVVCY010000055.1 | Eru1     |
| Escherichia coli strain H134240606 SAMN03492175-rid9086843.denovo.113, whole genome shotgun sequence | AAVVFQ010000059.1 | Eru1     |
| Escherichia coli strain H122220862 SAMN03492174-rid9086833.guided.158, whole genome shotgun sequence | AAVVPS010000058.1 | Eru1     |
| Escherichia coli strain H131980146 SAMN03492180-rid9086873.guided.160, whole genome shotgun sequence | AAVVJC010000072.1 | Eru1     |
| Escherichia coli strain H122140365 SAMN03492185-rid9086923.guided.176, whole genome shotgun sequence | AAVVKG010000054.1 | Eru2     |
| Escherichia coli strain H121100178 SAMN03492188-rid9086953.guided.106, whole genome shotgun sequence | AAVVA010000065.1  | Eru1     |
| Escherichia coli strain H121100178 SAMN03492188-rid9086953.denovo.051, whole genome shotgun sequence | AAVVHE010000064.1 | Eru1     |
| Escherichia coli strain H121620528 SAMN03492190-rid9086973.guided.173, whole genome shotgun sequence | AAVVHY010000075.1 | ND       |
| Escherichia coli strain H093700590 SAMN03492192-rid9086993.guided.171, whole genome shotgun sequence | AAVVGZ010000088.1 | ND       |
| Escherichia coli strain H122460420 SAMN03492195-rid9087023.guided.248, whole genome shotgun sequence | AAVVRJ010000077.1 | Eru7     |
| Escherichia coli strain H121820144 SAMN03492208-rid9087123.guided.155, whole genome shotgun sequence | AAVVWR010000124.1 | Eru2     |
| <b>Stx1</b>                                                                                          |                   |          |
| Escherichia coli strain H125180252 SAMN03492074-rid9086033.denovo.004, whole genome shotgun sequence | AAVXML010000004.1 | eru4     |
| Escherichia coli strain E1653600 SAMN03703076-rid9072093.denovo.004, whole genome shotgun sequence   | AATHWC010000004.1 | Eru13    |
| Escherichia coli strain H131620832 SAMN03492568-rid9038543.denovo.007, whole genome shotgun sequence | AAVVNQ010000007.1 | lambdoid |
| Escherichia coli strain H132360377 SAMN03492323-rid9087503.denovo.001, whole genome shotgun sequence | AAVVS010000001.1  | lambdoid |
| Escherichia coli strain H133040516 SAMN03492437-rid9037593.denovo.004, whole genome shotgun sequence | AAVVPQ010000004.1 | eru4     |
| Escherichia coli strain H103460518 SAMN03492465-rid9037983.denovo.006, whole genome shotgun sequence | AAVVO010000006.1  | lambdoid |
| Escherichia coli strain H113320446 SAMN03492141-rid9086543.denovo.064, whole genome shotgun sequence | AAVVVG010000064.1 | Eru1     |
| Escherichia coli strain H130960185 SAMN03492409-rid9087913.denovo.075, whole genome shotgun sequence | AAVVM010000074.1  | Eru1     |
| Escherichia coli strain E113096 SAMN03703088-rid9072583.denovo.051, whole genome shotgun sequence    | AATHVY010000051.1 | lambdoid |
| Escherichia coli strain E1688150 SAMN03702926-rid9033583.denovo.059, whole genome shotgun sequence   | AATIBF010000058.1 | lambdoid |
| Escherichia coli strain H103780083 SAMN03492786-rid9061363.denovo.051, whole genome shotgun sequence | AAVVJM010000050.1 | Eru11    |

|                                                                                                        |                   |          |
|--------------------------------------------------------------------------------------------------------|-------------------|----------|
| Escherichia coli strain H122220222 SAMN03492104-rid9086243.denovo.054, whole genome shotgun sequence   | AAVVWI01000053.1  | lambdoid |
| Escherichia coli strain H123000125 SAMN03492075-rid9086043.denovo.061, whole genome shotgun sequence   | AAVVXF01000060.1  | lambdoid |
| Escherichia coli strain H134660555 SAMN03702957-rid9033863.denovo.051, whole genome shotgun sequence   | AATIAB01000050.1  | lambdoid |
| Escherichia coli strain H122980845 SAMN03492153-rid9086653.denovo.106, whole genome shotgun sequence   | AAVVUY010000106.1 | lambdoid |
| Escherichia coli strain WX011665S01E SAMN03496101-rid9061543.denovo.055, whole genome shotgun sequence | AAVVGH01000054.1  | lambdoid |
| Escherichia coli strain H123340502 SAMN03492674-rid9039133.denovo.051, whole genome shotgun sequence   | AAVVMC01000050.1  | lambdoid |
| Escherichia coli strain H122960360 SAMN03492359-rid9087693.denovo.092, whole genome shotgun sequence   | AAVVRIO1000092.1  | lambdoid |
| Escherichia coli strain H123980865 SAMN03492202-rid9087063.denovo.054, whole genome shotgun sequence   | AAVVTR01000053.1  | lambdoid |
| Escherichia coli strain H122760538 SAMN03492653-rid9038943.denovo.066, whole genome shotgun sequence   | AAVVMW01000065.1  | lambdoid |
| Escherichia coli strain WX016375S01E SAMN03496188-rid9080733.denovo.051, whole genome shotgun sequence | AAVMDM01000050.1  | lambdoid |
| Escherichia coli strain WX017993S01E SAMN03496184-rid9080543.denovo.052, whole genome shotgun sequence | AAVVEW01000051.1  | lambdoid |
| Escherichia coli strain H123040570 SAMN03492632-rid9038833.denovo.093, whole genome shotgun sequence   | AAVVHC01000093.1  | lambdoid |
| Escherichia coli strain H123120512 SAMN03492068-rid9086013.denovo.074, whole genome shotgun sequence   | AAVVXJ01000073.1  | lambdoid |
| Escherichia coli strain H123200240 SAMN03492225-rid9087283.denovo.052, whole genome shotgun sequence   | AAVVSS01000051.1  | lambdoid |
| Escherichia coli strain H124440480 SAMN03492126-rid9086423.denovo.052, whole genome shotgun sequence   | AAVVVT01000051.1  | ND       |
| Escherichia coli strain H104620471 SAMN03492154-rid9086663.denovo.062, whole genome shotgun sequence   | AAVVUS01000061.1  | lambdoid |
| Escherichia coli strain H102980650 SAMN03492463-rid9037963.denovo.060, whole genome shotgun sequence   | AAVVS01000060.1   | lambdoid |
| Escherichia coli strain H132080461 SAMN03492034-rid9085713.denovo.065, whole genome shotgun sequence   | AAVVYL01000064.1  | lambdoid |
| Escherichia coli strain H122440402 SAMN03492475-rid9038083.denovo.055, whole genome shotgun sequence   | AAVVOH01000054.1  | lambdoid |
| Escherichia coli strain H121800664 SAMN03702960-rid9033893.denovo.060, whole genome shotgun sequence   | AATIAA01000059.1  | lambdoid |
| Escherichia coli strain H113580158 SAMN03492105-rid9086253.denovo.052, whole genome shotgun sequence   | AAVVWF01000051.1  | lambdoid |
| Escherichia coli strain H121380674 SAMN03492111-rid9086303.denovo.068, whole genome shotgun sequence   | AAVVWD01000068.1  | lambdoid |
| Escherichia coli strain WX016320S01E SAMN03496190-rid9080753.denovo.050, whole genome shotgun sequence | AAVVDJ01000049.1  | lambdoid |
| Escherichia coli strain H123740300 SAMN03492626-rid9038773.denovo.058, whole genome shotgun sequence   | AAVVHJ01000057.1  | lambdoid |
| Escherichia coli strain E1753820 SAMN03703008-rid9034313.denovo.054, whole genome shotgun sequence     | AATHYI01000053.1  | lambdoid |
| Escherichia coli strain H121620536 SAMN03492418-rid9088013.denovo.089, whole genome shotgun sequence   | AAVVQC01000089.1  | lambdoid |
| Escherichia coli strain H130740146 SAMN03492441-rid9037623.denovo.054, whole genome shotgun sequence   | AAVVPM01000053.1  | lambdoid |
| Escherichia coli strain H132480192 SAMN03492045-rid9085803.denovo.070, whole genome shotgun sequence   | AAVVYG01000069.1  | lambdoid |
| Escherichia coli strain H123880634 SAMN03492052-rid9085853.denovo.096, whole genome shotgun sequence   | AAVVYD01000096.1  | lambdoid |
| Escherichia coli strain H122980190 SAMN03492442-rid9037633.denovo.124, whole genome shotgun sequence   | AAVVPO010000124.1 | lambdoid |
| Escherichia coli strain H123840423 SAMN03492519-rid9038683.denovo.069, whole genome shotgun sequence   | AAVVS01000069.1   | lambdoid |
| Escherichia coli strain H121100178 SAMN03492188-rid9086953.denovo.054, whole genome shotgun sequence   | AAVVTX01000053.1  | lambdoid |
| Escherichia coli strain H132940671 SAMN03492649-rid9038913.denovo.083, whole genome shotgun sequence   | AAVVNC01000081.1  | Eru1     |
| Escherichia coli strain H133040516 SAMN03492437-rid9037593.guided.073, whole genome shotgun sequence   | AAVVPQ010000128.1 | Eru4     |

|                                                                                                                                |                          |                 |
|--------------------------------------------------------------------------------------------------------------------------------|--------------------------|-----------------|
| Escherichia coli strain E1745770 SAMN03702990-rid9034143.denovo.061, whole genome shotgun sequence                             | AATHZE010000060.1        | ND              |
| Escherichia coli strain E1747730 SAMN03702922-rid9033553.denovo.063, whole genome shotgun sequence                             | AATIBI010000062.1        | lambdoid        |
| Escherichia coli strain H130300235 SAMN03492425-rid9033073.denovo.183, whole genome shotgun sequence                           | AAVVQB010000182.1        | ND              |
| <b>PRJNA715185</b>                                                                                                             |                          |                 |
| <b>Diversity of STEC in flour from Germany</b>                                                                                 |                          |                 |
| <b>Strain</b>                                                                                                                  | <b>NCBI Accession no</b> | <b>Eru type</b> |
| <b>Stx2</b>                                                                                                                    |                          |                 |
| Escherichia coli strain BfR-EC-17777 60, whole genome shotgun sequence                                                         | JAGEWD010000060.1        | ND              |
| Escherichia coli strain BfR-EC-17374 67, whole genome shotgun sequence                                                         | JAGEXU010000067.1        | ND              |
| Escherichia coli strain BfR-EC-17741 53, whole genome shotgun sequence                                                         | JAGEWM010000053.1        | ND              |
| Escherichia coli strain BfR-EC-17656 61, whole genome shotgun sequence                                                         | JAGEXI010000061.1        | ND              |
| Escherichia coli strain BfR-EC-17705 59, whole genome shotgun sequence                                                         | JAGEWZ010000059.1        | ND              |
| Escherichia coli strain BfR-EC-17730 55, whole genome shotgun sequence                                                         | JAGEWO010000055.1        | ND              |
| Escherichia coli strain BfR-EC-17709 60, whole genome shotgun sequence                                                         | JAGEWY010000060.1        | ND              |
| Escherichia coli strain BfR-EC-17710 59, whole genome shotgun sequence                                                         | JAGEXW010000059.1        | ND              |
| Escherichia coli strain BfR-EC-17722 59, whole genome shotgun sequence                                                         | JAGEWS010000059.1        | ND              |
| Escherichia coli strain BfR-EC-17655 58, whole genome shotgun sequence                                                         | JAGEXJ010000058.1        | ND              |
| Escherichia coli strain BfR-EC-17679 44, whole genome shotgun sequence                                                         | JAGEXB010000044.1        | Eru9            |
| Escherichia coli strain BfR-EC-17841 contig00037, whole genome shotgun sequence                                                | JAGEVW010000037.1        | Eru9            |
| Escherichia coli strain BfR-EC-17718 47, whole genome shotgun sequence                                                         | JAGEWW010000047.1        | ND              |
| Escherichia coli strain BfR-EC-17719 47, whole genome shotgun sequence                                                         | JAGEWV010000047.1        | ND              |
| Escherichia coli strain BfR-EC-17680 51, whole genome shotgun sequence                                                         | JAGEXA010000051.1        | Eru9            |
| Escherichia coli strain BfR-EC-17678 39, whole genome shotgun sequence                                                         | JAGEXC010000039.1        | Eru9            |
| Escherichia coli strain BfR-EC-17778 35, whole genome shotgun sequence                                                         | JAGEWC010000035.1        | ND              |
| Escherichia coli strain BfR-EC-17779 34, whole genome shotgun sequence                                                         | JAGEWB010000034.1        | ND              |
| Escherichia coli strain BfR-EC-17387 9, whole genome shotgun sequence                                                          | JAGEXQ010000009.1        | Eru9            |
| <b>Stx1</b>                                                                                                                    |                          |                 |
| Escherichia coli strain BfR-EC-17379 contig00014, whole genome shotgun sequence                                                | JAGEXT010000014.1        | ND              |
| Escherichia coli strain BfR-EC-17386 contig00011, whole genome shotgun sequence                                                | JAGEXR010000011.1        | ND              |
| Escherichia coli strain BfR-EC-17751 contig00012, whole genome shotgun sequence                                                | JAGEWI010000012.1        | ND              |
| Escherichia coli strain BfR-EC-17856 contig00002, whole genome shotgun sequence                                                | JAGEVS010000002.1        | ND              |
| Escherichia coli strain BfR-EC-17721 contig00001, whole genome shotgun sequence                                                | JAGEWT010000001.1        | ND              |
| Escherichia coli strain BfR-EC-17380 contig00001, whole genome shotgun sequence                                                | JAGEXS010000001.1        | ND              |
| <b>PRJNA643688</b>                                                                                                             |                          |                 |
| <b>Genome Sequences of twelve Shiga Toxin-Producing <i>Escherichia coli</i> Strains Isolated from dairy cattle in Portugal</b> |                          |                 |
| <b>Strain</b>                                                                                                                  | <b>NCBI Accession no</b> | <b>Eru type</b> |
| <b>Stx2</b>                                                                                                                    |                          |                 |
| Escherichia coli strain E7N3P7C8A Contig_26_consensus_sequence, whole genome shotgun sequence                                  | JACBWM010000026.1        | Eru1            |

|                                                                                                      |                          |                 |
|------------------------------------------------------------------------------------------------------|--------------------------|-----------------|
| Escherichia coli strain E7N8P4C1 Contig_42_consensus_sequence, whole genome shotgun sequence         | JACBWI010000042.1        | ND              |
| Escherichia coli strain E7N15P4C10 Contig_2_consensus_sequence, whole genome shotgun sequence        | JACBWG010000002.1        | Eru7            |
| Escherichia coli strain E7N18P5C8G Contig_17_consensus_sequence, whole genome shotgun sequence       | JACBWE010000017.1        | Eru8            |
| Escherichia coli strain E7N6P4C8A Contig_40_consensus_sequence, whole genome shotgun sequence        | JACBWL010000040.1        | ND              |
| Escherichia coli strain E7N6P4C8C Contig_53_consensus_sequence, whole genome shotgun sequence        | JACBWK010000053.1        | ND              |
| Escherichia coli strain E7N6P4C8F Contig_38_consensus_sequence, whole genome shotgun sequence        | JACBWJ010000038.1        | ND              |
| Escherichia coli strain E7N16P4C9 Contig_58_consensus_sequence, whole genome shotgun sequence        | JACBWF010000058.1        | ND              |
| Escherichia coli strain E7N6P4C8A Contig_34_consensus_sequence, whole genome shotgun sequence        | JACBWL010000034.1        | ND              |
| Escherichia coli strain E7N16P4C9 Contig_43_consensus_sequence, whole genome shotgun sequence        | JACBWF010000043.1        | ND              |
| Escherichia coli strain E7N8P4C1 Contig_5_consensus_sequence, whole genome shotgun sequence          | JACBWI010000005.1        | Eru8            |
| Escherichia coli strain E7N6P4C8C Contig_36_consensus_sequence, whole genome shotgun sequence        | JACBWK010000036.1        | ND              |
| Escherichia coli strain E7N6P4C8C Contig_59_consensus_sequence, whole genome shotgun sequence        | JACBWK010000059.1        | ND              |
| Escherichia coli strain E7N16P4C9 Contig_59_consensus_sequence, whole genome shotgun sequence        | JACBWF010000059.1        | ND              |
| Escherichia coli strain E7N6P4C8F Contig_63_consensus_sequence, whole genome shotgun sequence        | JACBWJ010000063.1        | ND              |
| <b>Stx1</b>                                                                                          |                          |                 |
| Escherichia coli strain E7N18P5C8G Contig_11_consensus_sequence, whole genome shotgun sequence       | JACBWE010000011.1        | Eru7            |
| Escherichia coli strain E7N6P4C8A Contig_12_consensus_sequence, whole genome shotgun sequence        | JACBWL010000012.1        | Eru6            |
| Escherichia coli strain E7N6P4C8C Contig_24_consensus_sequence, whole genome shotgun sequence        | JACBWK010000024.1        | Eru6            |
| Escherichia coli strain E7N6P4C8F Contig_36_consensus_sequence, whole genome shotgun sequence        | JACBWJ010000036.1        | ND              |
| Escherichia coli strain E7N16P4C9 Contig_28_consensus_sequence, whole genome shotgun sequence        | JACBWF010000028.1        | Eru6            |
| Escherichia coli strain E7V12P1C4G Contig_79_consensus_sequence, whole genome shotgun sequence       | JACBWN010000079.1        | ND              |
| Escherichia coli strain E7N3P7C8A Contig_56_consensus_sequence, whole genome shotgun sequence        | JACBWM010000056.1        | lambdoid        |
| Escherichia coli strain E7V3P1C1 Contig_7_consensus_sequence, whole genome shotgun sequence          | JACBWP010000007.1        | ND              |
| Escherichia coli strain E7V4P1C10 Contig_30_consensus_sequence, whole genome shotgun sequence        | JACBWO010000030.1        | ND              |
| Escherichia coli strain E7N12P2C4 Contig_71_consensus_sequence, whole genome shotgun sequence        | JACBWH010000071.1        | ND              |
| <b>PRJNA438214</b>                                                                                   |                          |                 |
| <b>Draft genomes sequences of 18 <i>Escherichia coli</i> STEC strains from Switzerland</b>           |                          |                 |
| <b>Strain</b>                                                                                        | <b>NCBI Accession no</b> | <b>Eru type</b> |
| <b>Stx2</b>                                                                                          |                          |                 |
| Escherichia coli strain 364060-17 NODE_89_length_17522_cov_9.483185, whole genome shotgun sequence   | PYSE010000089.1          | Eru7            |
| Escherichia coli strain 364062-17 NODE_5_length_99620_cov_14.092529, whole genome shotgun sequence   | PYSC010000005.1          | Eru7            |
| Escherichia coli strain 364064-17 NODE_95_length_16865_cov_12.828414, whole genome shotgun sequence  | PYSA010000095.1          | Eru7            |
| Escherichia coli strain 364068-17 NODE_93_length_15220_cov_19.738422, whole genome shotgun sequence  | PYRX010000093.1          | Eru7            |
| Escherichia coli strain 364073-17 NODE_64_length_24383_cov_39.192117, whole genome shotgun sequence  | PYRU010000064.1          | Eru7            |
| Escherichia coli strain 364082-17 NODE_100_length_13439_cov_15.958609, whole genome shotgun sequence | PYRR01000100.1           | Eru7            |
| Escherichia coli strain 364072-17 scaffold_0186, whole genome shotgun sequence                       | PYRP01000186.1           | ND              |
| Escherichia coli strain 364079-17 scaffold_0171, whole genome shotgun sequence                       | PYRO01000171.1           | ND              |

|                                                                                                      |                |      |
|------------------------------------------------------------------------------------------------------|----------------|------|
| Escherichia coli strain 364059-17 NODE_126_length_11966_cov_12.106850, whole genome shotgun sequence | PYSF01000126.1 | Eru7 |
| Escherichia coli strain 364061-17 NODE_88_length_15513_cov_19.573573, whole genome shotgun sequence  | PYSD01000088.1 | Eru7 |
| Escherichia coli strain 364063-17 scaffold_0125, whole genome shotgun sequence                       | PYSB01000125.1 | Eru7 |
| Escherichia coli strain 364067-17 scaffold_0011, whole genome shotgun sequence                       | PYRY01000011.1 | Eru7 |
| Escherichia coli strain 364069-17 NODE_71_length_15513_cov_65.140517, whole genome shotgun sequence  | PYRW01000071.1 | Eru7 |
| Escherichia coli strain 364070-17 scaffold_0017, whole genome shotgun sequence                       | PYRV01000017.1 | Eru7 |
| Escherichia coli strain 364075-17 NODE_73_length_15513_cov_42.632068, whole genome shotgun sequence  | PYRT01000073.1 | Eru7 |
| Escherichia coli strain 364077-17 NODE_88_length_15513_cov_17.408748, whole genome shotgun sequence  | PYRS01000088.1 | Eru7 |
| Escherichia coli strain 364071-17 scaffold_0089, whole genome shotgun sequence                       | PYRQ01000089.1 | Eru7 |
| Escherichia coli strain 364066-17 scaffold_0737, whole genome shotgun sequence                       | PYRZ01000737.1 | ND   |
| Escherichia coli strain 364066-17 scaffold_0504, whole genome shotgun sequence                       | PYRZ01000504.1 | ND   |
