# Supplementary material for: High diversity in the regulatory region of Shiga toxin encoding bacteriophages
Source: PubMed Central journal article supplement (PMC8951638; doi:10.1186/s12864-022-08428-5), 2022-03-24
Supplement: 12864_2022_8428_MOESM3_ESM.pdf [file 12864_2022_8428_MOESM3_ESM.pdf]

### Additional file 3

#### Information about the 260 CI sequences used in phylogenetic analysis

| CI ID (NCBI) | Phage/Strain                                           | Serotype | NCBI ACCESSION NO | Origin    | Year | Stx type | Eru type |
|--------------|--------------------------------------------------------|----------|-------------------|-----------|------|----------|----------|
| ACI32363.1   | Enterobacteria phage YYZ-2008                          | O157:H7  | FJ184280          | Canada    | 2008 | Stx1     | Eru2     |
| ACI43117.1   | Stx2 Converting phage 1717                             | O157:H7  | FJ188381          | Canada    | 2008 | Stx2     | Eru2     |
| ADN68413.1   | Stx2 converting phage vB_EcoP_24B                      | O157:H7  | HM208303.1        | UK        | 2010 | Stx2     | Eru5     |
| AHZ95179.1   | Shigella phage POCJ13                                  |          | KJ603229.1        | USA       | 2014 | Stx1     | Eru4     |
| AIF74338.1   | Escherichia Stx1-converting recombinant phage HUN/2013 | O157:H7  | KJ909655.1        | Hungary   | 2013 | Stx1     | Eru3     |
| AKI86003.1   | Escherichia phage PA4                                  | O157:H7  | KP682372.1        | USA       | 2015 | Stx2     | Eru3     |
| AKI86096.1   | Escherichia phage PA5                                  | O157:H7  | KP682373.1        | USA       | 2015 | Stx2     | Eru3     |
| AKI86274.1   | Escherichia phage PA11                                 | O157:H7  | KP682375.1        | USA       | 2015 | Stx2     | Eru3     |
| AKI86367.1   | Escherichia phage PA16                                 | O157:H7  | KP682377.1        | USA       | 2015 | Stx2     | Eru3     |
| AKI86553.1   | Escherichia phage PA21                                 | O157:H7  | KP682379.1        | USA       | 2015 | Stx2     | Eru3     |
| AKI86648.1   | Escherichia phage PA27                                 | O157:H7  | KP682380.1        | USA       | 2015 | Stx2     | Eru3     |
| AKI86748.1   | Escherichia phage PA28                                 | O157:H7  | KP682381.1        | USA       | 2015 | Stx2     | lambdoid |
| AKI86834.1   | Escherichia phage PA29                                 | O157:H7  | KP682382.1        | USA       | 2015 | Stx2     | Eru3     |
| AKI87206.1   | Escherichia phage PA36                                 | O157:H7  | KP682386.1        | USA       | 2015 | Stx2     | Eru3     |
| AKI87302.1   | Escherichia phage PA42                                 | O157:H7  | KP682387.1        | USA       | 2015 | Stx2     | Eru3     |
| AKI87492.1   | Escherichia phage PA45                                 | O157:H7  | KP682389.1        | USA       | 2015 | Stx2     | Eru3     |
| AKI87588.1   | Escherichia phage PA50                                 | O157:H7  | KP682390.1        | USA       | 2015 | Stx2     | Eru3     |
| AKI87680.1   | Escherichia phage PA52                                 | O157:H7  | KP682392.1        | USA       | 2015 | Stx2     | Eru3     |
| AKJ74710.1   | Escherichia phage PA12                                 | O157:H7  | KP682376.1        | USA       | 2015 | Stx2     | Eru3     |
| ANJ63820.1   | Stx1 converting phage AU5Stx1                          | O157     | KU977419.1        | Australia | 2016 | Stx1     | lambdoid |
| ANJ63898.1   | Stx1 converting phage AU6Stx1                          | O157     | KU977420.1        | Australia | 2016 | Stx1     | lambdoid |
| AVD99089.1   | Escherichia phage GER2                                 | O117:H7  | MG710528.1        | UK        | 2017 | Stx1     | Eru1     |
| BAB87968.1   | Stx2 Converting phage 1                                | O157:H7  | AP004402          | Japan     | 2001 | Stx2     | lambdoid |
| BAC77937.1   | Morioka V526                                           | O157:H7  | AP005153.1        | Japan     | 2003 | Stx1     | Eru3     |
| BAC78103.1   | Morioka V526                                           | O157:H7  | AP005154.1        | Japan     |      | Stx2     | Eru3     |
| BAT31827.1   | Stx2-converting phage Stx2a_F403 proviral              | O157:H7  | AP012529.1        | Japan     | 2012 | Stx2     | Eru5     |
| BAT31911.1   | Stx2-converting phage Stx2a_F349                       | O157:H7  | AP012530.1        | Japan     | 2015 | Stx2     | Eru2     |
| BAT32000.1   | Stx2-converting phage Stx2a_F422 proviral              | O157:H7  | AP012531.1        | Japan     | 2012 | Stx2     | lambdoid |
| BAT32093.1   | Stx2-converting phage Stx2a_F451                       | O157:H8  | AP012532.1        | Japan     | 2012 | Stx2     | Eru5     |
| BAT32177.1   | Stx2-converting phage Stx2a_F723                       | O157:H9  | AP012533.1        | Japan     | 2012 | Stx2     | lambdoid |
| BAT32263.1   | Stx2-converting phage Stx2a_F765 proviral              | O157:H7  | AP012534.1        | Japan     | 2012 | Stx2     | Eru1     |
| BAT32321.1   | Stx2-converting phage Stx2a_WGPS9 proviral             | O157:H7  | AP012535.1        | Japan     | 2012 | Stx2     | lambdoid |
| BAT32387.1   | Stx2-converting phage Stx2a_1447 proviral              | O157:H7  | AP012536.1        | Japan     | 2012 | Stx2     | Eru6     |
| BAT32452.1   | Stx2-converting phage Stx2a_WGPS2 proviral             | O157:H7  | AP012537.1        | Japan     | 2012 | Stx2     | Eru6     |
| BAT32531.1   | Stx2-converting phage Stx2a_WGPS4 proviral             | O157:H7  | AP012538.1        | Japan     | 2012 | Stx2     | Eru2     |
| BAT32614.1   | Stx2-converting phage Stx2a_WGPS6 proviral             | O157:H7  | AP012539.1        | Japan     | 2012 | Stx2     | Eru2     |

|              |                                               |          |                   |         |      |      |          |
|--------------|-----------------------------------------------|----------|-------------------|---------|------|------|----------|
| BAT32693.1   | Stx2-converting phage<br>Stx2a_WGPS8 proviral | O157:H7  | AP012540.1        | Japan   | 2012 | Stx2 | Eru2     |
| BCI48989.1   | Stx2a-converting phage<br>Stx2_14040          | O145:H28 | LC567818.1        | Japan   | 2020 | Stx2 | Eru7     |
| BCI49050.1   | Stx1a-converting phage<br>Stx1_14040          | O145:H28 | LC567819.1        | Japan   | 2020 | Stx1 | Eru7     |
| BCI49153.1   | Stx2a-converting phage<br>Stx2_14744          | O145:H28 | LC567820.1        | Japan   | 2020 | Stx2 | Eru7     |
| BCI49214.1   | Stx1a-converting phage<br>Stx1_14744          | O145:H28 | LC567821.1        | Japan   | 2020 | Stx1 | Eru7     |
| CAC83529.1   | Enterobacteria phage phiP27                   | ONT:H-   | AJ298298          | Germany | 2002 | Stx2 | Eru7     |
| CAD88825.1   | Phage BP-4795 complete<br>genome              | O84:H4   | AJ556162.1        | Germany | 2003 | Stx1 | lambdoid |
| CAQ82008.1   | Enterobacteria phage 2851                     | O157:H7  | FM180578.1        | Germany | 1993 | Stx2 | Eru2     |
| CCG06176.1   | Escherichia phage P13374<br>proviral          | O104:H4  | HE664024.1        | Germany | 2011 | Stx2 | Eru1     |
| CDK12686.1   | Escherichia phage P13803                      | O2:H27   | HG792102.1        | Germany | 2013 | Stx2 | Eru1     |
| CDK23993.1   | Escherichia phage P14437                      | O104:H4  | HG792105.1        | Norway  | 2006 | Stx2 | Eru1     |
| CDL18842.1   | Escherichia phage P13771                      | O104:H4  | HG792104.1        | Germany | 2009 | Stx2 | Eru1     |
| EEC26960.1   | TW14588                                       | O157:H7  | ABKY02000003      | USA     | 2006 | Stx2 | Eru3     |
| EEC27821.1   | TW14588                                       | O157:H7  | ABKY02000002      | USA     | 2006 | Stx2 | Eru1     |
| EFL4537683.1 | E1653600                                      | O157:H7  | AATHWC01000004.1  | UK      |      | Stx1 | Eru13    |
| EFL4561882.1 | E113096                                       | O157:H7  | AATHVY010000051.1 | UK      |      | Stx1 | lambdoid |
| EFL4759493.1 | H123800424                                    | O157:H7  | AATHXA010000027.1 | UK      |      | Stx2 | Eru7     |
| EFL4780259.1 | H122920156                                    | O157:H7  | AATHXD010000066.1 | UK      |      | Stx2 | Eru1     |
| EFL4785786.1 | H121320380                                    | O157:H7  | AATHWY010000053.1 | UK      |      | Stx2 | Eru7     |
| EFL4810920.1 | H102820427                                    | O157:H7  | AATHXU010000060.1 | UK      |      | Stx2 | Eru1     |
| EFL4852155.1 | E1753820                                      | O157:H7  | AATHYI010000053.1 | UK      |      | Stx1 | lambdoid |
| EFL5060758.1 | H121800664                                    | O157:H7  | AATIAA010000059.1 | UK      |      | Stx1 | lambdoid |
| EFL5163126.1 | H134660555                                    | O157:H7  | AATIAB010000050.1 | UK      |      | Stx1 | lambdoid |
| EFL5223636.1 | E1688150                                      | O157:H7  | AATIBF010000058.1 | UK      |      | Stx1 | lambdoid |
| EGE5688604.1 | H134240606                                    | O157:H7  | AAVVCY010000055.1 | UK      |      | Stx2 | Eru2     |
| EGE5822072.1 | WX016320S01E                                  | O157:H7  | AAVVDJ010000049.1 | UK      |      | Stx1 | lambdoid |
| EGE5827186.1 | WX016375S01E                                  | O157:H7  | AAVVDM010000050.1 | UK      |      | Stx1 | lambdoid |
| EGE5841739.1 | H122880422                                    | O157:H7  | AAVVDW010000029.1 | UK      |      | Stx2 | Eru1     |
| EGE5909574.1 | H123480455                                    | O157:H7  | AAVVED010000052.1 | UK      |      | Stx2 | Eru5     |
| EGE5954436.1 | H122920157                                    | O157:H7  | AAVVEV010000056.1 | UK      |      | Stx2 | Eru1     |
| EGE5963960.1 | H123400303                                    | O157:H7  | AAVVF010000037.1  | UK      |      | Stx2 | Eru1     |
| EGE6051643.1 | WX017993S01E                                  | O157:H7  | AAVVEW010000051.1 | UK      |      | Stx1 | lambdoid |
| EGE6056760.1 | H134240606                                    | O157:H7  | AAVVFQ010000059.1 | UK      |      | Stx2 | Eru1     |
| EGE6062049.1 | H121980151                                    | O157:H7  | AAVFK010000056.1  | UK      |      | Stx2 | Eru1     |
| EGE6148684.1 | WX011665S01E                                  | O157:H7  | AAVVG010000054.1  | UK      |      | Stx1 | lambdoid |
| EGE6228835.1 | H123180903                                    | O157:H7  | AAVVGX010000027.1 | UK      |      | Stx2 | Eru7     |
| EGE6276458.1 | H121100178                                    | O157:H7  | AAVVHE010000064.1 | UK      |      | Stx2 | Eru1     |
| EGE6286513.1 | H123040570                                    | O157:H7  | AAVVHC010000093.1 | UK      |      | Stx1 | lambdoid |
| EGE6307131.1 | H123740300                                    | O157:H7  | AAVVHJ010000057.1 | UK      |      | Stx1 | lambdoid |
| EGE6419498.1 | H123840423                                    | O157:H7  | AAVVHS010000069.1 | UK      |      | Stx1 | lambdoid |
| EGE6460037.1 | H121600272                                    | O157:H7  | AAVVIM010000068.1 | UK      |      | Stx2 | Eru7     |

|              |            |         |                   |    |  |      |          |
|--------------|------------|---------|-------------------|----|--|------|----------|
| EGE6542355.1 | H131980146 | O157:H7 | AAVVJC010000072.1 | UK |  | Stx2 | Eru1     |
| EGE6605736.1 | H063160363 | O157:H7 | AAVVJN010000025.1 | UK |  | Stx2 | Eru7     |
| EGE6633054.1 | H123680777 | O157:H7 | AAVVJS010000064.1 | UK |  | Stx2 | Eru1     |
| EGE6689883.1 | H122140365 | O157:H7 | AAVVKG010000054.1 | UK |  | Stx2 | Eru2     |
| EGE6708400.1 | H101980207 | O157:H7 | AAVVKJ010000028.1 | UK |  | Stx2 | Ery7     |
| EGE6722855.1 | H122440404 | O157:H7 | AAVVKN010000025.1 | UK |  | Stx2 | Eru7     |
| EGE6749235.1 | H091920551 | O157:H7 | AAVVKR010000027.1 | UK |  | Stx2 | Eru7     |
| EGE6922782.1 | H121780072 | O157:H7 | AAVVLZ010000015.1 | UK |  | Stx2 | Eru7     |
| EGE6963583.1 | H121620527 | O157:H7 | AAVVMJ010000033.1 | UK |  | Stx2 | Eru1     |
| EGE6977926.1 | H053000190 | O157:H7 | AAVVMi010000016.1 | UK |  | Stx2 | Eru2     |
| EGE6982261.1 | H132920427 | O157:H7 | AAVVMm010000010.1 | UK |  | Stx2 | Eru2     |
| EGE7018974.1 | H063100370 | O157:H7 | AAVVMs010000018.1 | UK |  | Stx2 | Eru7     |
| EGE7050911.1 | H093940423 | O157:H7 | AAVVMY010000048.1 | UK |  | Stx2 | Eru7     |
| EGE7055905.1 | H122760538 | O157:H7 | AAVVMW010000065.1 | UK |  | Stx1 | lambdoid |
| EGE7073250.1 | H121560360 | O157:H7 | AAVVNG010000004.1 | UK |  | Stx2 | Eru1     |
| EGE7134837.1 | H131620832 | O157:H7 | AAVVNQ010000007.1 | UK |  | Stx1 | lambdoid |
| EGE7146195.1 | H094000312 | O157:H7 | AAVVNS010000026.1 | UK |  | Stx2 | Eru7     |
| EGE7166646.1 | H094000293 | O157:H7 | AAVVOA010000015.1 | UK |  | Stx2 | Eru7     |
| EGE7199773.1 | H121320380 | O157:H7 | AAVVOD010000067.1 | UK |  | Stx2 | Eru1     |
| EGE7230283.1 | H122440402 | O157:H7 | AAVVOH010000054.1 | UK |  | Stx1 | lambdoid |
| EGE7333290.1 | H121100178 | O157:H7 | AAVVPA010000065.1 | UK |  | Stx2 | Eru1     |
| EGE7343382.1 | H130740146 | O157:H7 | AAVVPM010000053.1 | UK |  | Stx1 | lambdoid |
| EGE7370760.1 | H133040516 | O157:H7 | AAVVPO010000004.1 | UK |  | Stx1 | Eru4     |
| EGE7389752.1 | H122220862 | O157:H7 | AAVVPS010000058.1 | UK |  | Stx2 | Eru1     |
| EGE7394257.1 | H122980190 | O157:H7 | AAVVPO010000124.1 | UK |  | Stx1 | lambdoid |
| EGE7456400.1 | H121620536 | O157:H7 | AAVVQC010000089.1 | UK |  | Stx1 | lambdoid |
| EGE7512252.1 | H130960185 | O157:H7 | AAVVQM010000074.1 | UK |  | Stx1 | Eru1     |
| EGE7526414.1 | H123880824 | O157:H7 | AAVVQR010000015.1 | UK |  | Stx2 | Eru2     |
| EGE7568803.1 | H122900266 | O157:H7 | AAVVQZ010000056.1 | UK |  | Stx2 | Eru7     |
| EGE7603615.1 | H122460748 | O157:H7 | AAVVRE010000037.1 | UK |  | Stx2 | Eru1     |
| EGE7625108.1 | H122960360 | O157:H7 | AAVVRI010000092.1 | UK |  | Stx1 | lambdoid |
| EGE7644261.1 | H123780462 | O157:H7 | AAVVrm010000028.1 | UK |  | Stx2 | Eru7     |
| EGE7696677.1 | H132360377 | O157:H7 | AAVVSB010000001.1 | UK |  | Stx1 | lambdoid |
| EGE7750849.1 | H112340317 | O157:H7 | AAVVSL010000029.1 | UK |  | Stx2 | Eru1     |
| EGE7793292.1 | H123200240 | O157:H7 | AAVVSS010000051.1 | UK |  | Stx1 | lambdoid |
| EGE7868356.1 | H052720465 | O157:H7 | AAVVsu010000026.1 | UK |  | Stx2 | Eru7     |
| EGE7880002.1 | H124600634 | O157:H7 | AAVVTC010000107.1 | UK |  | Stx2 | Eru1     |
| EGE7946210.1 | H123980865 | O157:H7 | AAVVTR010000053.1 | UK |  | Stx1 | lambdoid |
| EGE7955773.1 | H120540363 | O157:H7 | AAVVtu010000036.1 | UK |  | Stx2 | Eru1     |
| EGE7978731.1 | H123760762 | O157:H7 | AAVVtZ010000010.1 | UK |  | Stx2 | Eru7     |
| EGE8029056.1 | H121620525 | O157:H7 | AAVVtX010000050.1 | UK |  | Stx2 | Eru5     |

|              |            |          |                   |             |      |      |          |
|--------------|------------|----------|-------------------|-------------|------|------|----------|
| EGE8029099.1 | H121100178 | O157:H7  | AAVVTX010000053.1 | UK          |      | Stx1 | lambdoid |
| EGE8059842.1 | H104620471 | O157:H7  | AAVVUS010000061.1 | UK          |      | Stx1 | lambdoid |
| EGE8089196.1 | H063100370 | O157:H7  | AAVVUX010000016.1 | UK          |      | Stx2 | Eru7     |
| EGE8094777.1 | H122980845 | O157:H7  | AAVVUY010000106.1 | UK          |      | Stx1 | lambdoid |
| EGE8105221.1 | H113320446 | O157:H7  | AAVVVG010000064.1 | UK          |      | Stx1 | Eru1     |
| EGE8114167.1 | H135020660 | O157:H7  | AAVVVF010000015.1 | UK          |      | Stx2 | Eru7     |
| EGE8120612.1 | H043240557 | O157:H7  | AAVVVB010000025.1 | UK          |      | Stx2 | Eru7     |
| EGE8122814.1 | H121560360 | O157:H7  | AAVVVC010000003.1 | UK          |      | Stx2 | Eru1     |
| EGE8201356.1 | H123820316 | O157:H7  | AAVVVU010000025.1 | UK          |      | Stx2 | Eru7     |
| EGE8248496.1 | H121380674 | O157:H7  | AAVVWD010000068.1 | UK          |      | Stx1 | lambdoid |
| EGE8253777.1 | H133400671 | O157:H7  | AAVVVC010000072.1 | UK          |      | Stx2 | Eru7     |
| EGE8259112.1 | H113580158 | O157:H7  | AAVVWF010000051.1 | UK          |      | Stx1 | lambdoid |
| EGE8285006.1 | H122220222 | O157:H7  | AAVVWI010000053.1 | UK          |      | Stx1 | lambdoid |
| EGE8319594.1 | H132580296 | O157:H7  | AAVVWR010000124.1 | UK          |      | Stx2 | Eru2     |
| EGE8396302.1 | H123000125 | O157:H7  | AAVVXF010000060.1 | UK          |      | Stx1 | lambdoid |
| EGE8406126.1 | H103680174 | O157:H7  | AAVVXH010000123.1 | UK          |      | Stx2 | Eru7     |
| EGE8409932.1 | H123900440 | O157:H7  | AAVVXJ010000022.1 | UK          |      | Stx2 | Eru7     |
| EGE8411765.1 | H123120512 | O157:H7  | AAVVXJ010000073.1 | UK          |      | Stx1 | lambdoid |
| EGE8423942.1 | H125180252 | O157:H7  | AAVVXL010000004.1 | UK          |      | Stx1 | Eru4     |
| EGE8497699.1 | H094000312 | O157:H7  | AAVVXZ010000026.1 | UK          |      | Stx2 | Eru7     |
| EGE8529150.1 | H123880634 | O157:H7  | AAVVYD010000096.1 | UK          |      | Stx1 | lambdoid |
| EGE8534332.1 | H132480192 | O157:H7  | AAVVYG010000069.1 | UK          |      | Stx1 | lambdoid |
| EGE8565673.1 | H132080461 | O157:H7  | AAVVYL010000064.1 | UK          |      | Stx1 | lambdoid |
| EGE8879459.1 | H103460518 | O157:H7  | AAVVOT010000006.1 | UK          |      | Stx1 | lambdoid |
| EGE8936903.1 | H102980650 | O157:H7  | AAVVOS010000060.1 | UK          |      | Stx1 | lambdoid |
| KYR25636.1   | STEC 731   | O145:Hnt | LOFN01000117.1    | Netherlands | 2013 | Stx2 | Eru7     |
| KYR31563.1   | STEC 709   | O26:H11  | LOFM01000026.1    | Netherlands | 2013 | Stx2 | Eru7     |
| KYR32735.1   | STEC 709   | O26:H11  | LOFM01000001.1    | Netherlands | 2013 | Stx2 | Eru1     |
| KYR47546.1   | STEC 931   | O26:H11  | LOFS01000183.1    | Netherlands | 2013 | Stx2 | Eru1     |
| KYR50760.1   | STEC 886   | O91:H14  | LOFR01000041.1    | Netherlands | 2013 | Stx1 | Eru4     |
| KYR81241.1   | STEC 1188  | O91:H14  | LOFX01000035.1    | Netherlands | 2013 | Stx1 | Eru4     |
| KYS15770.1   | STEC 1293  | O26:H11  | LOGF01000197.1    | Netherlands | 2013 | Stx2 | Eru7     |
| KYS20709.1   | STEC 1299  | O128:H2  | LOGG01000109.1    | Netherlands | 2013 | Stx1 | Eru4     |
| KYS26052.1   | STEC1299   | O128:H2  | LOGG01000057.1    | Netherlands | 2013 | Stx2 | Eru6     |
| KYS37089.1   | STEC1375   | O185:H7  | LOGJ01000018.1    | Netherlands | 2013 | Stx2 | Eru7     |
| KYS42165.1   | STEC 1363  | O128:H2  | LOGI01000090.1    | Netherlands | 2013 | Stx2 | Eru6     |
| KYS44558.1   | STEC 1442  | O145:Hnt | LOGK01000083.1    | Netherlands | 2014 | Stx2 | Eru7     |
| KYS51717.1   | STEC 1465  | O128:H2  | LOGL01000097.1    | Netherlands | 2014 | Stx1 | Eru1     |
| KYS62574.1   | STEC 1500  | O76:H19  | LOGN01000031.1    | Netherlands | 2014 | Stx1 | Eru4     |
| KYS86001.1   | STEC1686   | O27:H30  | LOGT01000177.1    | Netherlands | 2014 | Stx2 | Eru10    |
| KYS86158.1   | STEC 1585  | O91:H14  | LOGR01000002.1    | Netherlands | 2014 | Stx1 | Eru4     |

|            |             |           |                |             |      |      |          |
|------------|-------------|-----------|----------------|-------------|------|------|----------|
| KYT16274.1 | STEC2193    | O103:H2   | LOGW01000035.1 | Netherlands | 2013 | Stx1 | lambdoid |
| KYT16329.1 | STEC 2236   | O113:H4   | LOGY01000073.1 | Netherlands | 2013 | Stx2 | lambdoid |
| KYT35599.1 | STEC 1506   | O5:H19    | LPWV01000121.1 | Netherlands | 2014 | Stx1 | Eru4     |
| KYT56146.1 | STEC 2363   | O91:H14   | LPWY01000046.1 | Netherlands | 2013 | Stx1 | Eru4     |
| KYT60009.1 | STEC 2419   | O103:H2   | LPWZ01000120.1 | Netherlands | 2013 | Stx1 | lambdoid |
| KYT71597.1 | STEC 2505   | O128:H2   | LPXB01000100.1 | Netherlands | 2013 | Stx2 | Eru6     |
| KYT71713.1 | STEC 2505   | O128:H2   | LPXB01000098.1 | Netherlands | 2013 | Stx1 | Eru4     |
| KYT73689.1 | STEC 2450   | O146:H21  | LPXA01000101.1 | Netherlands | 2013 | Stx1 | Eru4     |
| KYT80232.1 | STEC 2954   | O174:H8   | LPXE01000152.1 | Netherlands | 2013 | Stx1 | Eru4     |
| KYT81410.1 | STEC 2746   | O128ab:H2 | LPXD01000148.1 | Netherlands | 2013 | Stx2 | Eru6     |
| KYT86498.1 | STEC 2746   | O128ab:H2 | LPXD01000109.1 | Netherlands | 2013 | Stx1 | Eru4     |
| KYT97710.1 | STEC 2499   | O181:H49  | LOIE01000066.1 | Netherlands | 2013 | Stx1 | Eru7     |
| KYU10111.1 | STEC 2564   | O117:H7   | LOIG01000176.1 | Netherlands | 2013 | Stx1 | Eru1     |
| KYU17220.1 | STEC 2591   | O174:H2   | LOII01000032.1 | Netherlands | 2013 | Stx1 | Eru7     |
| KYU24994.1 | STEC 2633   | O146:H10  | LOIK01000066.1 | Netherlands | 2013 | Stx1 | Eru5     |
| KYU38540.1 | STEC 2764   | O174:H8   | LOIN01000127.1 | Netherlands | 2013 | Stx1 | Eru4     |
| KYU47608.1 | STEC 2788   | O91:H14   | LOIO01000033.1 | Netherlands | 2013 | Stx1 | Eru4     |
| KYU60947.1 | STEC 2841   | O nt:H20  | LOIQ01000003.1 | Netherlands | 2013 | Stx1 | Eru4     |
| KYU68016.1 | STEC 2894.1 | O1:H20    | LOIS01000032.1 | Netherlands | 2013 | Stx1 | Eru5     |
| KYU87735.1 | STEC2953    | O113:H4   | LOIW01000084.1 | Netherlands | 2016 | Stx2 | Eru10    |
| KYU88777.1 | STEC2953    | O113:H4   | LOIW01000078.1 | Netherlands | 2013 | Stx1 | Eru4     |
| KYU89986.1 | STEC 2980   | O128ab:H2 | LOIY01000194.1 | Netherlands | 2014 | Stx1 | Eru4     |
| KYU92507.1 | STEC 2962   | O91:H14   | LOIX01000034.1 | Netherlands | 2013 | Stx1 | Eru4     |
| KYV00368.1 | STEC2980    | O128ab:H2 | LOIY01000123.1 | Netherlands | 2014 | Stx2 | Eru6     |
| KYV06485.1 | STEC 3031   | O38:H26   | LOIZ01000129.1 | Netherlands | 2014 | Stx2 | Eru6     |
| KYV07180.1 | STEC 3031   | O38:H26   | LOIZ01000128.1 | Netherlands | 2014 | Stx1 | Eru4     |
| KYV16898.1 | STEC 2839   | O76:H19   | LOJB01000015.1 | Netherlands | 2013 | Stx1 | Eru4     |
| KYV23489.1 | STEC 2064   | O91:H14   | LOJC01000003.1 | Netherlands | 2013 | Stx1 | Eru4     |
| KYV25047.1 | STEC 2074   | O146:H21  | LOJD01000082.1 | Netherlands | 2013 | Stx1 | Eru4     |
| KYV25655.1 | STEC 66     | O165:H25  | LNFT01000172.1 | Netherlands | 2013 | Stx2 | Eru1     |
| KYV36935.1 | STEC 29     | O91:H14   | LNFU01000056.1 | Netherlands | 2013 | Stx1 | Eru4     |
| KYV47051.1 | STEC 196    | O91:H14   | LNZK01000067.1 | Netherlands | 2013 | Stx1 | Eru4     |
| KYV51123.1 | STEC 168    | O91:H14   | LNFO01000026.1 | Netherlands | 2013 | Stx1 | Eru4     |
| KYV59879.1 | STEC 200    | O174:H21  | LNZL01000033.1 | Netherlands | 2013 | Stx2 | Eru7     |
| KYV68949.1 | STEC 329    | O91:H14   | LOCT01000103.1 | Netherlands | 2013 | Stx1 | Eru4     |
| KYW17099.1 | STEC 559    | O182:H2   | LODC01000145.1 | Netherlands | 2013 | Stx1 | lambdoid |
| KYW31865.1 | STEC 565    | O121:H19  | LODE01000106.1 | Netherlands | 2013 | Stx2 | Eru2     |
| KYW38149.1 | STEC 645    | O91:H14   | LODG01000045.1 | Netherlands | 2013 | Stx1 | Eru4     |
| KYW59579.1 | STEC 3084   | O91:H14   | LPUI01000040.1 | Netherlands |      | Stx1 | Eru4     |
| KYW63559.1 | STEC 3087   | O91:H14   | LPUK01000020.1 | Netherlands | 2014 | Stx1 | Eru4     |
| KYW70309.1 | STEC 3106   | O91:H14   | LPUN01000125.1 | Netherlands |      | Stx1 | Eru4     |

|              |                             |          |                   |             |      |      |          |
|--------------|-----------------------------|----------|-------------------|-------------|------|------|----------|
| KYW76135.1   | STEC 3098                   | O174:H21 | LPUM01000015.1    | Netherlands | 2014 | Stx2 | Eru6     |
| MBH5127850.1 | 2018-439                    |          | JAEAMU010000071.1 | Switzerland | 2018 | Stx2 | Eru7     |
| MBH5152383.1 | 2017-353-1                  |          | JAEAMW010000071.1 | Switzerland | 2017 | Stx2 | Eru7     |
| MBH5157946.1 | S19-710-1                   |          | JAEAMY010000078.1 | Switzerland | 2019 | Stx2 | Eru7     |
| MBH5162990.1 | 2017-299-1                  |          | JAEAMX010000071.1 | Switzerland | 2017 | Stx2 | Eru7     |
| MBH5178762.1 | S19-30-1                    |          | JAEANC010000071.1 | Switzerland | 2019 | Stx2 | Eru7     |
| MBH5194740.1 | S19-18-1                    |          | JAEANE010000081.1 | Switzerland | 2019 | Stx2 | Eru7     |
| MBH5199905.1 | S19-101-1                   |          | JAEANF010000070.1 | Switzerland | 2019 | Stx2 | Eru7     |
| MBH5205094.1 | S18-73                      |          | JAEANH010000067.1 | Switzerland | 2018 | Stx2 | Eru7     |
| MBH5215298.1 | S18-9-1                     |          | JAEANG010000064.1 | Switzerland | 2018 | Stx2 | Eru7     |
| MBH5225647.1 | P17-291                     |          | JAEANK010000069.1 | Switzerland | 2017 | Stx2 | Eru7     |
| MBH5239801.1 | S18-168                     |          | JAEANJ010000068.1 | Switzerland | 2018 | Stx2 | Eru7     |
| MBI1440405.1 | STEC_UC4132                 |          | JACZHX010000017.1 | Italy       | 2019 | Stx1 | Eru7     |
| MBI1456586.1 | STEC_UC4130                 |          | JACZHZ010000017.1 | Italy       |      | Stx1 | Eru7     |
| MBI1465333.1 | STEC_UC4131                 |          | JACZHY010000023.1 | Italy       |      | Stx1 | Eru7     |
| MBI1490075.1 | STEC_UC4128                 |          | JACZIB010000017.1 | Italy       |      | Stx1 | Eru7     |
| MBL6171648.1 | LSC6-3                      |          | JAETZC010000029.1 | Switzerland | 2020 | Stx2 | Eru10    |
| MBL6193510.1 | LSC1-7                      |          | JAETZA010000009.1 | Switzerland | 2020 | Stx1 | Eru4     |
| MBL6204510.1 | ATC7-7                      |          | JAETYU010000018.1 | Switzerland |      | Stx1 | Eru4     |
| MBL6236395.1 | LSC1-58                     |          | JAETYZ010000032.1 | Switzerland | 2020 | Stx1 | Eru4     |
| MBL6291528.1 | LSC-5-20                    |          | JAETY010000002.1  | Switzerland | 2020 | Stx1 | Eru4     |
| MBL6338105.1 | ATC36-6                     |          | JAETYQ010000045.1 | Switzerland | 2020 | Stx1 | Eru4     |
| MBL6358120.1 | ATC-4-67                    |          | JAETYK010000017.1 | Switzerland | 2020 | Stx1 | Eru1     |
| MBL6374145.1 | ATC-15-17                   |          | JAETYI010000026.1 | Switzerland | 2020 | Stx1 | Eru1     |
| MBL6378896.1 | ATB47-1                     |          | JAETYG010000030.1 | Switzerland | 2020 | Stx2 | lambdoid |
| MBL6401972.1 | ATB-14-66                   |          | JAETYA010000007.1 | Switzerland | 2020 | Stx1 | Eru4     |
| MBL6419043.1 | ATB-10-31                   |          | JAETXY010000022.1 | Switzerland | 2020 | Stx1 | Eru4     |
| MBL9224177.1 | STEC 559                    | O182:H2  | LODC01000145.1    | Netherlands | 2013 | Stx1 | lambdoid |
| NP_309212.2  | Sakai                       | O157:H7  | NC_002695         | Japan       | 2000 | Stx2 | Eru3     |
| NP_311017.2  | Escherichia coli str. Sakai | O157:H7  | NC_002695         | Japan       | 2000 | Stx1 | lambdoid |
| NYR48883.1   | E7N18P5C8G                  | ONT:H28  | JACBWE010000011.1 | Portugal    | 2019 | Stx1 | Eru7     |
| NYR49962.1   | E7N18P5C8G                  | ONT:H28  | JACBWE010000017.1 | Portugal    | 2019 | Stx2 | Eru8     |
| NYR61457.1   | E7N15P4C10                  | O116:H21 | JACBWG010000002.1 | Portugal    | 2019 | Stx2 | Eru7     |
| NYR80058.1   | E7N6P4C8C                   | O29:H12  | JACBWK010000024.1 | Portugal    | 2019 | Stx1 | Eru6     |
| NYR83788.1   | E7N6P4C8A                   | O29:H12  | JACBWL010000012.1 | Portugal    | 2019 | Stx1 | Eru6     |
| NYS00014.1   | E7N3P7C8A                   | O150:H2  | JACBWM010000026.1 | Portugal    | 2019 | Stx2 | Eru1     |
| NYS00969.1   | E7N3P7C8A                   | O150:H2  | JACBWM010000056.1 | Portugal    | 2019 | Stx1 | lambdoid |
| PAT83787.1   | 536-9                       | O26:H11  | MRVS01000020.1    | Israel      | 2016 | Stx2 | Eru7     |
| PAT90662.1   | 479BS2                      | O26:H11  | MRVR01000011.1    | Israel      | 2016 | Stx2 | Eru7     |
| PAT95399.1   | 476-14                      | O26:H11  | MRVU01000049.1    | Israel      | 2016 | Stx2 | Eru7     |
| PAT99334.1   | 510-5                       | O26:H11  | MRVV01000040.1    | Israel      | 2016 | Stx2 | Eru7     |

|                 |                                                         |          |                   |             |      |      |          |
|-----------------|---------------------------------------------------------|----------|-------------------|-------------|------|------|----------|
| PAU07863.1      | 625C-4                                                  | O26:H11  | MRVW01000016.1    | Israel      | 2016 | Stx2 | Eru7     |
| PAU13589.1      | 514-2                                                   | O174:H21 | MRVZ01000122.1    | Israel      | 2016 | Stx2 | Eru7     |
| PAU30050.1      | 573-4                                                   | O171:H29 | MRWA01000015.1    | Israel      | 2016 | Stx2 | Eru7     |
| PRT57725.1      | St. Olav164                                             |          | PVRW01000040.1    | Norway      |      | Stx2 | Eru7     |
| QIW91713.1      | Lys8385Vzw                                              | O103:H11 | MT225100          | Japan       | 2020 | Stx1 | Eru6     |
| QIW91773.1      | Lys19259Vzw                                             | O157:H7  | MT225101          | Japan       | 2020 | Stx2 | lambdoid |
| QKA14637.1      | NE 1092-2                                               | O157:H7  | NZ_CP038328.1     | USA         | 2000 | Stx1 | Eru1     |
| QKA15101.1      | NE 1092-2                                               | O157:H7  | CP038328.1        | USA         | 2000 | Stx2 | Eru2     |
| YP_001648917.1  | Enterobacteria phage Min27                              | O157:H7  | NC_010237.1       | China       | 2007 | Stx2 | Eru5     |
| YP_002274230.1  | Stx2-converting phage 1717,<br>complete prophage genome | O157:H7  | NC_011357.1       | Canada      | 2008 | Stx2 | Eru2     |
| YP_009226843.1  | Shigella phage 75/02 Stx                                | Shigella | NC_029120.1       | Hungary     | 2013 | Stx1 | Eru4     |
| YP_009907967.1  | Escherichia phage SH2026Stx1                            | O157:H7  | NC_049919.1       | USA         | 2018 | Stx1 | Eru2     |
| YP_007001447.1  | TL-2011c                                                | O103:H4  | NC_019442         | Norway      | 2006 | Stx2 | Eru1     |
| AAD25430.1      | 933W                                                    | O157:H7  | NC_000924         | USA         | 1982 | Stx2 | lambdoid |
| NP_040628.1     | lambda                                                  |          | NC_001416         |             |      |      | lambdoid |
| JAGEXB010000044 | BfR-EC-17679                                            | O36:H14  | JAGEXB010000044.1 | Switzerland | 2018 | Stx2 | Eru9     |
| KYU24344.1      | STEC 2595                                               |          | LOIJ01000033.1    | Netherlands | 2013 | Stx2 | Eru11    |
| CCVP01000073    | FHI32                                                   |          | CCVP01000073.1    | Norway      | 2009 | Stx1 | Eru12    |
| YP_794110.1     | Stx2-converting phage 86                                | O86:H-   | NC_008464.1       | Japan       |      | Stx2 | Eru3     |
